# Supplementary material for: Modeling Cerebral Blood Flow Dependence on Carbon Dioxide and Mean Arterial Blood Pressure in the Immature Brain With Accounting for the Germinal Matrix
Source: Front Neurol. 2018 Oct 9;9:812. doi: 10.3389/fneur.2018.00812 (PMC6189337; doi:10.3389/fneur.2018.00812)
Supplement: Supplementary file 1 [file Table_1.xlsx]

## Sheet: Sheet1
Supplementary Table1: Original clinical data used in the study.
#Patient	WGA	body weight	ICH (yes=grad/no=0)	Day of ICH	day of life	PCO2	MAP
1	23.5	490	3	3	2.1	36.1	0
1	23.5	490	3	3	2.2	49.1	22
1	23.5	490	3	3	2.3	52.7	23
1	23.5	490	3	3	2.4	39.9	23
1	23.5	490	3	3	2.5	41.6	28
1	23.5	490	3	3	2.6	49.2	0
1	23.5	490	3	3	2.7	40.3	40
1	23.5	490	3	3	3.1	44.2	27
1	23.5	490	3	3	3.2	41.3	31
1	23.5	490	3	3	3.3	45.3	34
1	23.5	490	3	3	3.4	34.4	0
1	23.5	490	3	3	3.5	50.1	38
1	23.5	490	3	3	3.6	51.7	39
1	23.5	490	3	3	4.1	41.1	0
1	23.5	490	3	3	4.2	49.5	0
1	23.5	490	3	3	4.3	51.1	38
1	23.5	490	3	3	4.4	48.7	0
1	23.5	490	3	3	4.5	49.9	36
1	23.5	490	3	3	5.1	47	0
1	23.5	490	3	3	5.2	44.8	0
1	23.5	490	3	3	5.3	48.1	0
1	23.5	490	3	3	6.1	47	37
1	23.5	490	3	3	6.2	53	34
1	23.5	490	3	3	6.3	57.6	0
1	23.5	490	3	3	6.4	49.7	38
2	23.6	450	3	1	1.1	39	41
2	23.6	450	3	1	1.2	41.4	40
2	23.6	450	3	1	1.3	38.3	0
2	23.6	450	3	1	2.1	36	40
2	23.6	450	3	1	2.2	49.3	36
2	23.6	450	3	1	2.3	47.8	35
2	23.6	450	3	1	2.4	53.1	0
2	23.6	450	3	1	3.1	49.1	0
2	23.6	450	3	1	3.2	59.3	0
2	23.6	450	3	1	3.3	49.7	0
2	23.6	450	3	1	3.4	41	0
2	23.6	450	3	1	3.5	46.6	0
2	23.6	450	3	1	3.6	49.1	0
2	23.6	450	3	1	4.1	41.3	0
2	23.6	450	3	1	4.2	50.2	0
2	23.6	450	3	1	4.3	33.9	0
2	23.6	450	3	1	4.4	46.7	0
2	23.6	450	3	1	5.1	39.2	0
2	23.6	450	3	1	5.2	53.4	0
2	23.6	450	3	1	5.3	48.5	48
2	23.6	450	3	1	5.4	41.3	25
2	23.6	450	3	1	5.5	43.5	0
2	23.6	450	3	1	6.1	35.9	27
2	23.6	450	3	1	6.2	47.1	0
2	23.6	450	3	1	6.3	17.6	0
2	23.6	450	3	1	6.4	43.3	20
2	23.6	450	3	1	7.1	47.8	19
3	24.4	335	2	2	1.1	36.4	17
3	24.4	335	2	2	1.2	42.9	24
3	24.4	335	2	2	1.3	48.9	27
3	24.4	335	2	2	2.1	44.3	21
3	24.4	335	2	2	2.2	54	21
3	24.4	335	2	2	2.3	67.7	23
3	24.4	335	2	2	2.4	65.6	26
3	24.4	335	2	2	3.1	44	32
3	24.4	335	2	2	3.2	58.8	28
3	24.4	335	2	2	3.3	68.4	26
3	24.4	335	2	2	3.4	63.9	28
3	24.4	335	2	2	3.5	58.2	32
3	24.4	335	2	2	3.6	49.3	0
3	24.4	335	2	2	4.1	83.7	23
3	24.4	335	2	2	4.2	70.6	28
3	24.4	335	2	2	4.3	67.1	24
3	24.4	335	2	2	4.4	65.7	22
3	24.4	335	2	2	4.5	66.2	24
3	24.4	335	2	2	4.6	54.1	25
3	24.4	335	2	2	4.7	67	31
3	24.4	335	2	2	5.1	70.8	25
3	24.4	335	2	2	5.2	59.7	25
3	24.4	335	2	2	5.3	55.9	28
3	24.4	335	2	2	6.1	48	21
3	24.4	335	2	2	6.2	42.5	38
3	24.4	335	2	2	6.3	48.4	33
4	24.4	850	3	3	1.1	54	33
4	24.4	850	3	3	2.1	54	0
4	24.4	850	3	3	2.2	53	25
4	24.4	850	3	3	2.3	60.4	29
4	24.4	850	3	3	2.1	69.8	29
4	24.4	850	3	3	3.1	62.2	23
4	24.4	850	3	3	3.2	52.1	0
4	24.4	850	3	3	3.3	47.8	0
4	24.4	850	3	3	3.4	52	26
4	24.4	850	3	3	3.5	52.4	24
4	24.4	850	3	3	3.6	88.2	34
5	24.1	710	3	3	1.1	49.2	21
5	24.1	710	3	3	2.1	57.9	27
5	24.1	710	3	3	2.2	68.5	35
5	24.1	710	3	3	2.3	71	32
5	24.1	710	3	3	2.4	67.3	0
5	24.1	710	3	3	2.5	71.8	0
5	24.1	710	3	3	2.6	68.7	0
5	24.1	710	3	3	2.7	75.6	0
5	24.1	710	3	3	2.8	36.5	20
5	24.1	710	3	3	2.9	46.7	24
5	24.1	710	3	3	3.1	61.1	23
5	24.1	710	3	3	3.2	41.5	0
5	24.1	710	3	3	3.3	57.2	0
5	24.1	710	3	3	3.4	53.9	0
5	24.1	710	3	3	3.5	65.1	34
5	24.1	710	3	3	3.6	44.6	35
5	24.1	710	3	3	4.1	56	32
5	24.1	710	3	3	4.2	50.8	31
5	24.1	710	3	3	4.3	47.1	0
5	24.1	710	3	3	4.4	50	0
5	24.1	710	3	3	5.1	47.9	0
5	24.1	710	3	3	5.2	58.7	0
5	24.1	710	3	3	5.3	44.6	0
5	24.1	710	3	3	5.4	41	23
5	24.1	710	3	3	6.1	55.4	0
5	24.1	710	3	3	6.2	52.2	0
5	24.1	710	3	3	6.3	60.9	0
6	24.4	650	3	3	1.1	43.9	22
6	24.4	650	3	3	1.2	34.3	28
6	24.4	650	3	3	1.3	35.8	0
6	24.4	650	3	3	2.1	33.9	0
6	24.4	650	3	3	2.2	39.4	0
6	24.4	650	3	3	2.3	46.8	28
6	24.4	650	3	3	2.4	43.9	32
6	24.4	650	3	3	3.1	47.4	31
6	24.4	650	3	3	3.2	38.7	0
6	24.4	650	3	3	3.3	52.7	0
6	24.4	650	3	3	3.4	46.4	34
6	24.4	650	3	3	4.1	36.5	38
6	24.4	650	3	3	4.2	51.4	40
6	24.4	650	3	3	4.3	49.2	0
6	24.4	650	3	3	4.4	57.1	0
6	24.4	650	3	3	4.5	46.1	0
6	24.4	650	3	3	4.6	37.1	0
6	24.4	650	3	3	5.1	45.7	0
6	24.4	650	3	3	5.2	48.7	0
6	24.4	650	3	3	5.3	52.3	0
6	24.4	650	3	3	6.1	43.3	29
6	24.4	650	3	3	6.2	48.4	0
6	24.4	650	3	3	6.3	50.1	0
7	24.4	775	3	3	1.1	47	23
7	24.4	775	3	3	2.1	45.5	32
7	24.4	775	3	3	2.2	36.2	31
7	24.4	775	3	3	3.1	50.6	0
7	24.4	775	3	3	3.1	44.6	0
7	24.4	775	3	3	3.3	49.5	43
7	24.4	775	3	3	3.4	60.5	37
7	24.4	775	3	3	3.5	57.4	34
7	24.4	775	3	3	3.6	59.4	0
7	24.4	775	3	3	4.1	45.1	0
7	24.4	775	3	3	4.2	43.6	35
7	24.4	775	3	3	4.3	50	24
7	24.4	775	3	3	4.4	53.2	26
7	24.4	775	3	3	5.1	51.6	31
7	24.4	775	3	3	5.2	49.2	0
7	24.4	775	3	3	5.3	36.8	45
7	24.4	775	3	3	6.1	61.2	0
7	24.4	775	3	3	6.2	49.8	0
7	24.4	775	3	3	6.3	40.5	0
7	24.4	775	3	3	6.4	58.7	0
7	24.4	775	3	3	6.5	47.1	31
7	24.4	775	3	3	6.6	45.7	0
7	24.4	775	3	3	6.7	40.2	0
8	24.2	590	3	4	1.1	47.3	0
8	24.2	590	3	4	1.2	56.5	0
8	24.2	590	3	4	1.3	47.9	0
8	24.2	590	3	4	2.1	38.4	0
8	24.2	590	3	4	2.2	40.1	0
8	24.2	590	3	4	3.1	41.4	29
8	24.2	590	3	4	3.2	38.1	0
8	24.2	590	3	4	3.3	37.9	0
8	24.2	590	3	4	3.4	24.5	0
8	24.2	590	3	4	3.5	54	36
8	24.2	590	3	4	3.6	63.5	0
8	24.2	590	3	4	4.1	47	0
8	24.2	590	3	4	4.2	43.9	0
8	24.2	590	3	4	4.3	51	41
8	24.2	590	3	4	4.4	31.1	0
8	24.2	590	3	4	4.5	61.4	37
8	24.2	590	3	4	4.6	67.6	39
8	24.2	590	3	4	5.1	46.8	31
8	24.2	590	3	4	5.2	58.6	21
8	24.2	590	3	4	5.3	49.6	37
8	24.2	590	3	4	5.4	58.8	36
8	24.2	590	3	4	6.1	41	0
8	24.2	590	3	4	6.2	47.8	46
8	24.2	590	3	4	6.3	45.7	40
8	24.2	590	3	4	7.1	42.1	44
8	24.2	590	3	4	8.1	45.3	42
9	24.5	760	2	4	1.1	40.3	26
9	24.5	760	2	4	1.2	42.3	24
9	24.5	760	2	4	1.3	37.8	21
9	24.5	760	2	4	1.4	37.2	20
9	24.5	760	2	4	2.1	42	0
9	24.5	760	2	4	2.2	37.6	36
9	24.5	760	2	4	2.3	44	32
9	24.5	760	2	4	3.1	44.2	31
9	24.5	760	2	4	3.2	43.8	31
9	24.5	760	2	4	3.3	44.3	0
9	24.5	760	2	4	4.1	43.5	20
9	24.5	760	2	4	4.2	40.8	0
9	24.5	760	2	4	4.3	54.1	28
9	24.5	760	2	4	5.1	43.6	34
9	24.5	760	2	4	5.2	49.4	0
9	24.5	760	2	4	6.1	45.3	35
9	24.5	760	2	4	7.1	49.9	38
10	25.6	730	3	3	1.1	41	27
10	25.6	730	3	3	2.1	36.9	28
10	25.6	730	3	3	2.2	32.8	0
10	25.6	730	3	3	2.3	33.1	29
10	25.6	730	3	3	2.4	38.2	25
10	25.6	730	3	3	2.5	76.8	28
10	25.6	730	3	3	2.6	52.3	0
10	25.6	730	3	3	2.7	63.7	17
10	25.6	730	3	3	2.8	47.8	24
10	25.6	730	3	3	2.9	54.8	30
10	25.6	730	3	3	2.95	60	0
10	25.6	730	3	3	3.1	53.9	0
10	25.6	730	3	3	3.2	70.8	0
10	25.6	730	3	3	3.3	38.8	44
10	25.6	730	3	3	3.4	39	47
10	25.6	730	3	3	4.1	45.9	38
10	25.6	730	3	3	4.2	53.6	50
10	25.6	730	3	3	4.3	54	0
10	25.6	730	3	3	4.4	52.5	52
10	25.6	730	3	3	4.5	34.4	47
10	25.6	730	3	3	5.1	37.8	42
10	25.6	730	3	3	5.2	82.3	36
10	25.6	730	3	3	5.3	57.6	40
10	25.6	730	3	3	6.1	61.7	0
10	25.6	730	3	3	6.2	54	0
10	25.6	730	3	3	6.3	44	36
11	26.3	875	3	4	1.1	36	0
11	26.3	875	3	4	1.2	32	0
11	26.3	875	3	4	2.1	41	0
11	26.3	875	3	4	2.2	44.8	0
11	26.3	875	3	4	2.3	46.4	0
11	26.3	875	3	4	2.4	46	0
11	26.3	875	3	4	2.5	42	37
11	26.3	875	3	4	2.6	41.5	35
11	26.3	875	3	4	3.1	71.8	26
11	26.3	875	3	4	3.2	71.8	13
11	26.3	875	3	4	3.3	54	22
11	26.3	875	3	4	3.4	52	25
11	26.3	875	3	4	3.5	60	21
11	26.3	875	3	4	3.6	59.6	21
11	26.3	875	3	4	3.7	40.7	29
11	26.3	875	3	4	3.8	59.9	22
11	26.3	875	3	4	3.85	54.9	36
11	26.3	875	3	4	3.9	54.2	32
11	26.3	875	3	4	3.95	56.6	30
11	26.3	875	3	4	4.1	55	30
11	26.3	875	3	4	4.2	45	32
11	26.3	875	3	4	4.3	48	35
11	26.3	875	3	4	4.4	53.4	41
11	26.3	875	3	4	4.5	47.8	42
11	26.3	875	3	4	4.6	71	36
11	26.3	875	3	4	5.1	68	0
11	26.3	875	3	4	5.2	67	40
11	26.3	875	3	4	5.3	54	31
11	26.3	875	3	4	5.4	56.3	36
11	26.3	875	3	4	5.5	81.4	0
11	26.3	875	3	4	6.1	65	38
11	26.3	875	3	4	6.2	55.7	0
11	26.3	875	3	4	6.3	51.1	34
11	26.3	875	3	4	6.4	43	32
11	26.3	875	3	4	7.1	53	39
11	26.3	875	3	4	7.2	80	32
11	26.3	875	3	4	7.3	58	0
11	26.3	875	3	4	7.4	63	0
11	26.3	875	3	4	7.5	52	0
12	26.0	805	3	3	1.1	54.5	25
12	26.0	805	3	3	1.2	49.2	0
12	26.0	805	3	3	1.3	49.2	21
12	26.0	805	3	3	1.4	51	35
12	26.0	805	3	3	2.1	66.5	0
12	26.0	805	3	3	2.2	83	0
12	26.0	805	3	3	2.3	42	24
12	26.0	805	3	3	2.4	73	35
12	26.0	805	3	3	2.5	52	0
12	26.0	805	3	3	2.6	50.3	37
12	26.0	805	3	3	3.1	50.2	22
12	26.0	805	3	3	3.2	51.2	48
12	26.0	805	3	3	3.3	42	48
12	26.0	805	3	3	3.4	44.2	29
12	26.0	805	3	3	3.5	34.5	0
12	26.0	805	3	3	4.1	71.5	23
12	26.0	805	3	3	4.2	47.1	27
12	26.0	805	3	3	4.3	48.3	0
12	26.0	805	3	3	5.1	45.9	0
12	26.0	805	3	3	5.2	54.6	41
12	26.0	805	3	3	5.3	44.8	0
12	26.0	805	3	3	5.4	49.1	43
12	26.0	805	3	3	6.1	53.1	0
12	26.0	805	3	3	6.2	39.1	23
13	26.1	520	2	3	1.1	44.2	35
13	26.1	520	2	3	1.2	57	25
13	26.1	520	2	3	1.3	53.7	0
13	26.1	520	2	3	1.4	38.6	0
13	26.1	520	2	3	1.5	48.1	0
13	26.1	520	2	3	1.6	46.2	26
13	26.1	520	2	3	2.1	28.5	23
13	26.1	520	2	3	2.2	47.7	24
13	26.1	520	2	3	2.3	53.3	31
13	26.1	520	2	3	2.4	43.1	43
13	26.1	520	2	3	2.5	60.2	0
13	26.1	520	2	3	3.1	53	0
13	26.1	520	2	3	3.2	52.5	29
13	26.1	520	2	3	3.3	55.8	0
13	26.1	520	2	3	3.4	41.8	42
13	26.1	520	2	3	3.5	32.6	23
13	26.1	520	2	3	4.1	46.6	0
13	26.1	520	2	3	4.2	46	40
13	26.1	520	2	3	4.3	49.9	43
13	26.1	520	2	3	4.4	46	48
13	26.1	520	2	3	4.5	80	0
13	26.1	520	2	3	4.6	37.1	52
13	26.1	520	2	3	5.1	58	0
13	26.1	520	2	3	5.2	52.9	0
13	26.1	520	2	3	5.3	49.9	31
13	26.1	520	2	3	5.4	49.7	0
13	26.1	520	2	3	6.1	48.7	0
13	26.1	520	2	3	6.2	69.8	36
13	26.1	520	2	3	6.3	50.2	0
13	26.1	520	2	3	6.4	50.2	33
13	26.1	520	2	3	6.5	51.6	0
14	26.1	630	2	8	2.1	36.7	29
14	26.1	630	2	8	2.2	44.7	24
14	26.1	630	2	8	2.3	40.2	28
14	26.1	630	2	8	2.4	42.3	33
14	26.1	630	2	8	2.5	40	35
14	26.1	630	2	8	3.1	75.4	0
14	26.1	630	2	8	3.2	45.2	31
14	26.1	630	2	8	3.3	57.8	0
14	26.1	630	2	8	3.4	48.3	0
14	26.1	630	2	8	3.5	58.4	0
14	26.1	630	2	8	4.1	46.9	0
14	26.1	630	2	8	4.2	49.3	0
14	26.1	630	2	8	4.3	55.4	0
14	26.1	630	2	8	4.4	70.7	0
14	26.1	630	2	8	5.1	62.8	0
14	26.1	630	2	8	5.2	60.5	0
14	26.1	630	2	8	5.3	57.1	0
14	26.1	630	2	8	5.4	32.6	0
14	26.1	630	2	8	6.1	44.6	31
14	26.1	630	2	8	6.2	46.9	0
14	26.1	630	2	8	7.1	43.4	0
14	26.1	630	2	8	7.2	48.3	0
14	26.1	630	2	8	7.3	52.6	24
14	26.1	630	2	8	7.4	37.3	19
14	26.1	630	2	8	7.5	65	0
14	26.1	630	2	8	7.6	52.9	19
14	26.1	630	2	8	7.7	44.2	22
14	26.1	630	2	8	7.8	40.7	0
14	26.1	630	2	8	7.85	53.3	0
14	26.1	630	2	8	7.9	55.8	22
14	26.1	630	2	8	7.95	49.4	30
14	26.1	630	2	8	8.1	77.1	0
14	26.1	630	2	8	8.2	66.8	0
14	26.1	630	2	8	8.3	66.1	0
14	26.1	630	2	8	8.4	67	38
14	26.1	630	2	8	8.5	56.6	0
14	26.1	630	2	8	8.6	53.9	0
14	26.1	630	2	8	9.1	55.8	0
14	26.1	630	2	8	9.2	64.8	0
14	26.1	630	2	8	9.3	46.3	41
14	26.1	630	2	8	9.4	47.4	0
14	26.1	630	2	8	9.5	56.6	38
14	26.1	630	2	8	10.1	53.6	0
14	26.1	630	2	8	10.2	60.5	0
14	26.1	630	2	8	10.3	60.1	23
14	26.1	630	2	8	10.4	58.5	0
14	26.1	630	2	8	11.1	72.8	40
14	26.1	630	2	8	11.2	45.4	51
14	26.1	630	2	8	11.3	45.4	0
14	26.1	630	2	8	11.4	36.6	0
14	26.1	630	2	8	11.5	63.3	0
14	26.1	630	2	8	12.1	63.2	0
14	26.1	630	2	8	12.2	81.4	0
14	26.1	630	2	8	12.3	56.4	27
14	26.1	630	2	8	12.4	60.8	40
15	26.0	770	3	4	1.1	44	20
15	26.0	770	3	4	1.2	45.4	30
15	26.0	770	3	4	1.2	45	27
15	26.0	770	3	4	2.1	46	23
15	26.0	770	3	4	2.2	36.2	27
15	26.0	770	3	4	2.3	42	28
15	26.0	770	3	4	2.4	53.8	0
15	26.0	770	3	4	2.5	46.4	27
15	26.0	770	3	4	2.6	40.8	0
15	26.0	770	3	4	2.7	56.4	31
15	26.0	770	3	4	3.1	39	0
15	26.0	770	3	4	3.2	54.9	30
15	26.0	770	3	4	3.3	79	0
15	26.0	770	3	4	3.4	40.7	26
15	26.0	770	3	4	3.5	27.2	27
15	26.0	770	3	4	3.6	45.4	31
15	26.0	770	3	4	4.1	42.8	40
15	26.0	770	3	4	4.2	42.4	0
15	26.0	770	3	4	5.1	45.1	29
15	26.0	770	3	4	5.2	42.8	0
15	26.0	770	3	4	5.3	39.4	34
15	26.0	770	3	4	6.1	35.5	0
15	26.0	770	3	4	7.1	48	32
15	26.0	770	3	4	7.2	59.6	0
15	26.0	770	3	4	7.3	72.9	0
16	26.4	950	2	3	1.1	48.7	31
16	26.4	950	2	3	1.2	44.6	0
16	26.4	950	2	3	1.3	34	32
16	26.4	950	2	3	1.4	34.8	33
16	26.4	950	2	3	2.1	47.8	0
16	26.4	950	2	3	2.2	49.3	30
16	26.4	950	2	3	2.3	36	34
16	26.4	950	2	3	3.1	38	0
16	26.4	950	2	3	3.2	48	46
16	26.4	950	2	3	3.3	38	0
16	26.4	950	2	3	3.4	32.5	43
16	26.4	950	2	3	4.1	32	0
16	26.4	950	2	3	4.2	36.8	33
16	26.4	950	2	3	4.3	47.6	0
16	26.4	950	2	3	4.4	44.5	32
16	26.4	950	2	3	4.5	43.6	31
16	26.4	950	2	3	5.1	42.3	0
16	26.4	950	2	3	5.2	34	0
16	26.4	950	2	3	5.3	41.4	0
16	26.4	950	2	3	6.1	39.5	0
16	26.4	950	2	3	6.2	45.1	0
16	26.4	950	2	3	6.3	35.1	0
16	26.4	950	2	3	6.4	46.9	34
16	26.4	950	2	3	6.5	46.4	36
16	26.4	950	2	3	7.1	41.3	32
16	26.4	950	2	3	7.2	35.5	0
16	26.4	950	2	3	8.1	34	0
17	26.4	1080	3	3	1.1	40.5	31
17	26.4	1080	3	3	1.2	55.7	32
17	26.4	1080	3	3	1.3	35	28
17	26.4	1080	3	3	2.1	35.6	37
17	26.4	1080	3	3	2.2	30	28
17	26.4	1080	3	3	3.1	34.1	0
17	26.4	1080	3	3	3.2	29.1	0
17	26.4	1080	3	3	4.1	27	36
17	26.4	1080	3	3	4.2	31.7	0
17	26.4	1080	3	3	4.3	32.1	0
17	26.4	1080	3	3	4.4	39.9	29
17	26.4	1080	3	3	5.1	35.6	0
17	26.4	1080	3	3	5.2	35.5	40
17	26.4	1080	3	3	5.3	31.2	0
17	26.4	1080	3	3	6.1	41.7	35
17	26.4	1080	3	3	6.2	36.3	0
17	26.4	1080	3	3	9.1	48.5	0
17	26.4	1080	3	3	9.2	39	0
17	26.4	1080	3	3	10.1	43.9	0
17	26.4	1080	3	3	10.2	52.5	38
18	26.5	945	3	2	1.1	40	0
18	26.5	945	3	2	1.2	31.3	0
18	26.5	945	3	2	2.1	32.2	0
18	26.5	945	3	2	2.2	38.3	0
18	26.5	945	3	2	2.3	34.1	32
18	26.5	945	3	2	2.4	36.1	0
18	26.5	945	3	2	3.1	24.7	0
18	26.5	945	3	2	4.1	32.1	0
18	26.5	945	3	2	4.1	25.9	0
18	26.5	945	3	2	5.1	26.9	0
18	26.5	945	3	2	6.1	26.2	0
18	26.5	945	3	2	6.2	30.8	0
18	26.5	945	3	2	7.1	38.4	0
18	26.5	945	3	2	8.1	34.5	0
19	27.0	945	2	3	2.1	54.7	43
19	27.0	945	2	3	3.1	67	32
19	27.0	945	2	3	3.2	52.6	0
19	27.0	945	2	3	3.3	65.6	0
19	27.0	945	2	3	4.1	67.2	0
19	27.0	945	2	3	4.2	43	36
19	27.0	945	2	3	4.3	47.1	35
19	27.0	945	2	3	4.4	47.4	0
19	27.0	945	2	3	4.5	55	0
19	27.0	945	2	3	5.1	45.1	37
19	27.0	945	2	3	5.2	83.1	35
19	27.0	945	2	3	5.3	43.2	33
19	27.0	945	2	3	5.4	55.1	41
19	27.0	945	2	3	5.5	55.4	28
19	27.0	945	2	3	5.6	0	19
19	27.0	945	2	3	5.7	62.6	29
19	27.0	945	2	3	6.1	45.3	38
19	27.0	945	2	3	6.2	47.5	0
20	27.5	1320	3	6	2.1	39.9	34
20	27.5	1320	3	6	2.2	44	0
20	27.5	1320	3	6	2.3	42.8	0
20	27.5	1320	3	6	3.1	45.6	0
20	27.5	1320	3	6	4.1	36.9	0
20	27.5	1320	3	6	5.1	47.5	45
20	27.5	1320	3	6	6.1	0	0
20	27.5	1320	3	6	7.1	51.2	0
20	27.5	1320	3	6	8.1	48.3	0
20	27.5	1320	3	6	9.1	46.5	0
20	27.5	1320	3	6	10.1	45.7	0
20	27.5	1320	3	6	10.2	44.4	0
20	27.5	1320	3	6	10.3	48.9	48
21	27.6	630	2	4	1.1	49.6	17
21	27.6	630	2	4	1.2	41.4	18
21	27.6	630	2	4	2.1	31.2	0
21	27.6	630	2	4	3.1	34.6	0
21	27.6	630	2	4	4.1	34.1	0
21	27.6	630	2	4	5.1	38.5	0
21	27.6	630	2	4	5.2	37	0
21	27.6	630	2	4	6.1	34.5	41
21	27.6	630	2	4	6.2	34.1	0
22	27.6	1100	3	1	1.1	53.6	32
22	27.6	1100	3	1	1.2	68	29
22	27.6	1100	3	1	1.3	67.3	0
22	27.6	1100	3	1	1.4	58.5	0
22	27.6	1100	3	1	1.5	55	40
22	27.6	1100	3	1	2.1	49.4	0
22	27.6	1100	3	1	2.2	41.3	24
22	27.6	1100	3	1	2.3	49.4	30
22	27.6	1100	3	1	2.4	41	33
22	27.6	1100	3	1	2.5	56.3	24
22	27.6	1100	3	1	2.6	57.6	0
22	27.6	1100	3	1	3.1	55.6	0
22	27.6	1100	3	1	3.2	45.9	37
22	27.6	1100	3	1	3.3	33.8	0
22	27.6	1100	3	1	3.4	41	32
22	27.6	1100	3	1	3.5	58	41
22	27.6	1100	3	1	4.1	40.8	0
22	27.6	1100	3	1	4.2	44.2	0
22	27.6	1100	3	1	4.3	44.3	0
22	27.6	1100	3	1	4.4	38.3	0
23	27.3	950	3	2	2.1	59.5	32
23	27.3	950	3	2	2.2	33.4	28
23	27.3	950	3	2	2.3	39	35
23	27.3	950	3	2	2.4	85.2	0
23	27.3	950	3	2	3.1	82.1	34
23	27.3	950	3	2	3.2	52.5	31
23	27.3	950	3	2	3.3	48.5	34
23	27.3	950	3	2	3.4	50.7	34
23	27.3	950	3	2	3.5	47.1	37
23	27.3	950	3	2	3.6	45.2	0
23	27.3	950	3	2	3.7	52.4	0
23	27.3	950	3	2	3.8	52.6	0
23	27.3	950	3	2	4.1	63.2	23
23	27.3	950	3	2	4.2	54.4	25
23	27.3	950	3	2	4.3	70.5	24
23	27.3	950	3	2	4.4	34.7	0
23	27.3	950	3	2	5.1	45.2	40
23	27.3	950	3	2	5.2	51	0
23	27.3	950	3	2	6.1	50.8	0
23	27.3	950	3	2	6.2	48	0
23	27.3	950	3	2	6.3	58	30
23	27.3	950	3	2	6.4	38.1	33
23	27.3	950	3	2	7.1	40.8	0
23	27.3	950	3	2	7.2	42.5	33
23	27.3	950	3	2	7.3	34.5	0
23	27.3	950	3	2	8.1	52	0
23	27.3	950	3	2	8.2	40.9	0
23	27.3	950	3	2	9.1	46.5	0
23	27.3	950	3	2	9.2	43.6	31
24	28.5	1150	3	2	1.1	42.4	40
24	28.5	1150	3	2	1.2	75.7	0
24	28.5	1150	3	2	1.3	47.1	42
24	28.5	1150	3	2	1.4	43.9	37
24	28.5	1150	3	2	2.1	59.7	32
24	28.5	1150	3	2	2.2	35.9	35
24	28.5	1150	3	2	2.3	45.3	34
24	28.5	1150	3	2	2.4	51.9	0
24	28.5	1150	3	2	2.5	56.4	35
24	28.5	1150	3	2	2.6	48.6	0
24	28.5	1150	3	2	2.7	57.7	29
24	28.5	1150	3	2	2.8	44.1	37
24	28.5	1150	3	2	2.9	49.3	0
24	28.5	1150	3	2	2.95	53.1	40
24	28.5	1150	3	2	3.1	51.2	35
24	28.5	1150	3	2	3.2	59.2	0
24	28.5	1150	3	2	3.3	58.9	0
24	28.5	1150	3	2	3.4	108.4	49
25	28.1	1120	3	1	1.1	43.3	36
25	28.1	1120	3	1	2.1	31.1	0
25	28.1	1120	3	1	2.2	30.3	0
25	28.1	1120	3	1	3.1	26.4	0
25	28.1	1120	3	1	3.2	30	48
25	28.1	1120	3	1	4.1	28.7	0
25	28.1	1120	3	1	4.2	28.9	0
25	28.1	1120	3	1	4.3	28.7	51
26	29.5	1500	3	5	2.1	45.3	24
26	29.5	1500	3	5	2.2	39.3	33
26	29.5	1500	3	5	2.3	52	33
26	29.5	1500	3	5	2.4	35	26
26	29.5	1500	3	5	3.1	42.4	33
26	29.5	1500	3	5	3.2	46	0
26	29.5	1500	3	5	3.3	42.4	0
26	29.5	1500	3	5	3.4	46.2	39
26	29.5	1500	3	5	4.1	39.1	44
26	29.5	1500	3	5	4.2	69	39
26	29.5	1500	3	5	4.3	48.5	0
26	29.5	1500	3	5	5.1	47.4	0
26	29.5	1500	3	5	5.2	56.2	41
26	29.5	1500	3	5	5.3	58.7	48
26	29.5	1500	3	5	6.1	45.3	28
26	29.5	1500	3	5	6.2	39.7	33
26	29.5	1500	3	5	6.3	31.3	0
26	29.5	1500	3	5	7.1	49.5	43
26	29.5	1500	3	5	7.2	58	36
26	29.5	1500	3	5	7.3	46.5	0
26	29.5	1500	3	5	7.4	55.1	38
26	29.5	1500	3	5	8.1	39	0
26	29.5	1500	3	5	8.2	56.4	0
26	29.5	1500	3	5	8.3	55	0
26	29.5	1500	3	5	9.1	40.7	46
26	29.5	1500	3	5	9.2	57.8	0
26	29.5	1500	3	5	9.3	47	44
27	29.6	1465	2	4	1.1	51.7	37
27	29.6	1465	2	4	2.1	51.5	0
27	29.6	1465	2	4	2.2	40.6	34
27	29.6	1465	2	4	2.3	38.3	0
27	29.6	1465	2	4	3.1	35	0
27	29.6	1465	2	4	3.2	32	0
27	29.6	1465	2	4	3.3	30	0
27	29.6	1465	2	4	4.1	24.9	0
27	29.6	1465	2	4	5.1	34.6	0
27	29.6	1465	2	4	5.2	42	0
27	29.6	1465	2	4	6.1	45.3	0
27	29.6	1465	2	4	7.1	36.3	0
27	29.6	1465	2	4	8.1	41.3	0
27	29.6	1465	2	4	10.1	35	0
27	29.6	1465	2	4	11.1	35.1	0
27	29.6	1465	2	4	11.2	40	0
28	29.3	910	1	9	2.1	36.1	0
28	29.3	910	1	9	2.2	52.2	36
28	29.3	910	1	9	2.3	48	35
28	29.3	910	1	9	3.1	55.5	42
28	29.3	910	1	9	3.2	53.3	35
28	29.3	910	1	9	4.1	41.6	37
28	29.3	910	1	9	4.2	43.9	0
28	29.3	910	1	9	5.1	44.9	0
28	29.3	910	1	9	5.2	44	0
28	29.3	910	1	9	7.1	44.4	0
28	29.3	910	1	9	7.2	35.2	44
28	29.3	910	1	9	8.1	39.2	38
28	29.3	910	1	9	8.2	40.3	0
28	29.3	910	1	9	9.1	48	0
28	29.3	910	1	9	10.1	43.7	0
28	29.3	910	1	9	10.2	41	0
29	29.3	1350	3	4	2.1	51.4	38
29	29.3	1350	3	4	2.2	73.8	32
29	29.3	1350	3	4	2.3	47.8	32
29	29.3	1350	3	4	2.4	34.6	32
29	29.3	1350	3	4	3.1	38.6	38
29	29.3	1350	3	4	3.2	41.8	33
29	29.3	1350	3	4	3.3	45	32
29	29.3	1350	3	4	3.4	51	37
29	29.3	1350	3	4	4.1	43.3	0
29	29.3	1350	3	4	4.2	44.5	43
29	29.3	1350	3	4	4.3	53	33
29	29.3	1350	3	4	4.4	37.4	0
29	29.3	1350	3	4	5.1	55.9	0
29	29.3	1350	3	4	5.2	54.9	0
29	29.3	1350	3	4	5.3	56.6	0
29	29.3	1350	3	4	6.1	56.4	38
29	29.3	1350	3	4	6.2	50.4	0
29	29.3	1350	3	4	6.3	60.6	0
29	29.3	1350	3	4	6.4	53.4	0
29	29.3	1350	3	4	7.1	61.1	37
29	29.3	1350	3	4	7.2	52	0
29	29.3	1350	3	4	7.3	70.7	0
29	29.3	1350	3	4	8.1	75.6	0
29	29.3	1350	3	4	8.2	29.3	32
29	29.3	1350	3	4	9.1	56	41
29	29.3	1350	3	4	9.2	52.5	0
29	29.3	1350	3	4	9.3	44	0
29	29.3	1350	3	4	10.1	59	50
29	29.3	1350	3	4	10.2	60.5	46
29	29.3	1350	3	4	11.1	43	0
29	29.3	1350	3	4	11.2	44.6	0
29	29.3	1350	3	4	12.1	67	61
29	29.3	1350	3	4	12.2	40	50
29	29.3	1350	3	4	12.3	60.9	0
29	29.3	1350	3	4	12.4	59.8	0
30	30.0	1480	2	9	2.1	59.9	45
30	30.0	1480	2	9	3.1	51.3	55
30	30.0	1480	2	9	3.2	52.8	0
30	30.0	1480	2	9	4.1	59.9	55
30	30.0	1480	2	9	5.1	62.4	0
30	30.0	1480	2	9	5.2	52.3	0
30	30.0	1480	2	9	6.1	62.5	0
30	30.0	1480	2	9	6.2	62	50
30	30.0	1480	2	9	7.1	55.9	57
30	30.0	1480	2	9	8.1	53.3	0
30	30.0	1480	2	9	9.1	55.9	0
30	30.0	1480	2	9	9.2	74.9	0
30	30.0	1480	2	9	9.3	75.4	0
30	30.0	1480	2	9	9.4	70.3	58
30	30.0	1480	2	9	9.5	73.8	0
30	30.0	1480	2	9	10.1	74.3	61
30	30.0	1480	2	9	10.2	80.6	0
30	30.0	1480	2	9	10.3	76.1	0
30	30.0	1480	2	9	10.4	69.9	0
30	30.0	1480	2	9	11.1	78	0
30	30.0	1480	2	9	11.2	56.6	0
30	30.0	1480	2	9	11.3	61.6	0
31	30.3	1525	1	5	1.1	43.2	38
31	30.3	1525	1	5	2.1	54.5	32
31	30.3	1525	1	5	2.2	62.5	30
31	30.3	1525	1	5	2.3	48.5	0
31	30.3	1525	1	5	4.1	42.3	50
31	30.3	1525	1	5	4.2	34.4	0
31	30.3	1525	1	5	4.3	49.9	0
31	30.3	1525	1	5	4.4	50.5	0
31	30.3	1525	1	5	5.1	41	0
31	30.3	1525	1	5	6.1	41.4	0
31	30.3	1525	1	5	7.1	39.1	0
31	30.3	1525	1	5	7.2	37.9	0
31	30.3	1525	1	5	9.1	49	0
31	30.3	1525	1	5	10.1	53.8	45
31	30.3	1525	1	5	12.2	47.3	0
31	30.3	1525	1	5	13.1	34.8	0
32	30.0	1580	3	7	1.1	54.1	24
32	30.0	1580	3	7	2.1	52.6	38
32	30.0	1580	3	7	2.2	64.6	29
32	30.0	1580	3	7	2.3	40.7	35
32	30.0	1580	3	7	2.4	46.6	0
32	30.0	1580	3	7	3.1	64.1	0
32	30.0	1580	3	7	4.1	56.5	21
32	30.0	1580	3	7	6.1	45.3	0
32	30.0	1580	3	7	7.1	46.9	44
32	30.0	1580	3	7	8.1	49.6	0
32	30.0	1580	3	7	8.2	42.3	0
32	30.0	1580	3	7	9.1	46.1	0
32	30.0	1580	3	7	10.1	42.6	0
32	30.0	1580	3	7	11.1	47	0
32	30.0	1580	3	7	12.1	41.2	58
32	30.0	1580	3	7	13.1	43.5	0
32	30.0	1580	3	7	13.2	49	0
33	30.0	1575	2	11	5.1	46.7	53
33	30.0	1575	2	11	6.1	58.2	0
33	30.0	1575	2	11	6.2	55	0
33	30.0	1575	2	11	7.1	45.6	0
33	30.0	1575	2	11	9.1	43.4	0
33	30.0	1575	2	11	9.2	44.3	0
33	30.0	1575	2	11	10.1	32	0
33	30.0	1575	2	11	11.1	0	0
34	31.1	1460	1	5	1.1	95.6	0
34	31.1	1460	1	5	2.1	42.3	50
34	31.1	1460	1	5	4.1	63.5	0
34	31.1	1460	1	5	5.1	0	0
34	31.1	1460	1	5	6.1	57.7	40
34	31.1	1460	1	5	6.2	54.5	0
34	31.1	1460	1	5	7.1	56.9	0
34	31.1	1460	1	5	7.2	52.8	44
34	31.1	1460	1	5	8.1	49.9	0
35	31.1	1460	3	4	1.1	30	0
35	31.1	1460	3	4	1.2	37.7	56
35	31.1	1460	3	4	2.1	39.6	52
35	31.1	1460	3	4	2.2	38.6	51
35	31.1	1460	3	4	2.3	37.9	51
35	31.1	1460	3	4	2.4	37.3	0
35	31.1	1460	3	4	2.5	35.2	42
35	31.1	1460	3	4	3.1	38.5	47
35	31.1	1460	3	4	3.2	36.3	39
35	31.1	1460	3	4	4.1	33.7	0
35	31.1	1460	3	4	4.2	32.7	51
35	31.1	1460	3	4	4.3	33.7	0
35	31.1	1460	3	4	5.1	37.7	0
35	31.1	1460	3	4	5.2	39.4	58
35	31.1	1460	3	4	6.1	34.7	0
35	31.1	1460	3	4	6.2	31.2	0
35	31.1	1460	3	4	7.1	34.9	47
35	31.1	1460	3	4	7.2	33.2	48
36	32.5	2135	1	3	1.1	90.7	27
36	32.5	2135	1	3	1.2	82.2	32
36	32.5	2135	1	3	1.3	79.5	23
36	32.5	2135	1	3	1.4	50.7	0
36	32.5	2135	1	3	1.5	51.5	40
36	32.5	2135	1	3	2.1	31.7	39
36	32.5	2135	1	3	2.2	39.8	48
36	32.5	2135	1	3	2.3	37.3	17
36	32.5	2135	1	3	2.4	35.2	27
36	32.5	2135	1	3	2.5	41.4	20
36	32.5	2135	1	3	2.6	39	28
36	32.5	2135	1	3	2.7	31.7	31
36	32.5	2135	1	3	2.8	41	47
36	32.5	2135	1	3	3.1	44.7	30
36	32.5	2135	1	3	3.2	39.9	50
36	32.5	2135	1	3	3.3	34.7	60
36	32.5	2135	1	3	4.1	40.5	0
36	32.5	2135	1	3	4.2	40.6	0
36	32.5	2135	1	3	5.1	53.2	0
37	32.0	2000	1	4	1.1	54.9	34
37	32.0	2000	1	4	2.1	51.6	0
37	32.0	2000	1	4	2.2	60.8	39
37	32.0	2000	1	4	2.3	56.1	35
37	32.0	2000	1	4	3.1	63.9	0
37	32.0	2000	1	4	3.2	60.9	0
37	32.0	2000	1	4	3.3	60	0
37	32.0	2000	1	4	4.1	57.6	0
37	32.0	2000	1	4	4.2	49.2	0
37	32.0	2000	1	4	5.1	55.8	0
37	32.0	2000	1	4	5.2	46.1	0
37	32.0	2000	1	4	7.1	44.5	0
37	32.0	2000	1	4	7.2	50.6	0
37	32.0	2000	1	4	7.3	56.8	45
38	32.6	1240	2	1	1.1	30.8	0
38	32.6	1240	2	1	1.2	29.1	37
38	32.6	1240	2	1	2.1	33.2	0
38	32.6	1240	2	1	2.2	26.9	0
39	22.4	600	2	5	1.1	32	56
39	22.4	600	2	5	2.1	43.7	0
39	22.4	600	2	5	2.2	40	0
39	22.4	600	2	5	2.3	29.1	0
39	22.4	600	2	5	2.4	34	0
39	22.4	600	2	5	2.5	37	23
39	22.4	600	2	5	2.6	43.5	0
39	22.4	600	2	5	3.1	42.6	21
39	22.4	600	2	5	3.2	42	0
39	22.4	600	2	5	3.3	42.8	0
39	22.4	600	2	5	3.4	38.2	29
39	22.4	600	2	5	4.1	37	0
39	22.4	600	2	5	5.1	47.7	0
39	22.4	600	2	5	5.2	34.4	0
39	22.4	600	2	5	5.3	40.9	0
39	22.4	600	2	5	5.4	83.7	26
39	22.4	600	2	5	5.5	56.1	0
39	22.4	600	2	5	5.6	52.9	29
39	22.4	600	2	5	6.1	57.9	31
39	22.4	600	2	5	6.2	50.9	28
39	22.4	600	2	5	6.3	52.8	29
39	22.4	600	2	5	6.4	54.3	0
39	22.4	600	2	5	6.5	75.1	26
39	22.4	600	2	5	6.6	59.7	0
39	22.4	600	2	5	7.1	45.1	25
39	22.4	600	2	5	7.2	47.6	0
40	23.4	610	1	1	1.1	0	0
40	23.4	610	1	1	2.1	46	40
40	23.4	610	1	1	2.2	41.4	92
40	23.4	610	1	1	2.3	42.3	84
40	23.4	610	1	1	3.1	43	33
40	23.4	610	1	1	3.2	40.7	33
40	23.4	610	1	1	3.3	41.6	30
40	23.4	610	1	1	4.1	38.8	36
40	23.4	610	1	1	4.2	42.5	26
40	23.4	610	1	1	5.1	48.3	30
40	23.4	610	1	1	5.2	48.3	33
40	23.4	610	1	1	5.3	50.6	0
40	23.4	610	1	1	6.1	56.9	0
40	23.4	610	1	1	6.2	53.7	0
40	23.4	610	1	1	7.1	74	0
40	23.4	610	1	1	8.1	51.3	41
40	23.4	610	1	1	8.2	58	36
40	23.4	610	1	1	9.1	70.3	0
40	23.4	610	1	1	9.2	71.7	0
40	23.4	610	1	1	9.3	77.2	0
41	23.6	530	3	9	2.1	36.8	36
41	23.6	530	3	9	2.2	44	41
41	23.6	530	3	9	2.3	149	0
41	23.6	530	3	9	2.4	35.7	0
41	23.6	530	3	9	2.5	43.2	28
41	23.6	530	3	9	2.6	50	30
41	23.6	530	3	9	3.1	47.4	28
41	23.6	530	3	9	3.2	56.5	30
41	23.6	530	3	9	3.3	47.8	29
41	23.6	530	3	9	3.4	61.9	30
41	23.6	530	3	9	3.5	35	40
41	23.6	530	3	9	4.1	58.7	34
41	23.6	530	3	9	4.2	36.8	40
41	23.6	530	3	9	4.3	34.7	42
41	23.6	530	3	9	4.4	53.3	0
41	23.6	530	3	9	5.1	42.4	30
41	23.6	530	3	9	5.2	61.7	0
41	23.6	530	3	9	6.1	32.7	0
41	23.6	530	3	9	6.2	55.2	0
41	23.6	530	3	9	6.3	49.8	0
41	23.6	530	3	9	7.1	68.1	52
41	23.6	530	3	9	7.2	57.8	48
41	23.6	530	3	9	7.3	52	0
41	23.6	530	3	9	8.1	60.2	0
41	23.6	530	3	9	9.1	53.2	32
41	23.6	530	3	9	9.2	60.6	0
41	23.6	530	3	9	9.3	81.6	0
41	23.6	530	3	9	9.4	44.8	0
41	23.6	530	3	9	9.5	78.7	34
41	23.6	530	3	9	9.6	69.7	0
42	23.4	400	1	15	8.1	68	37
42	23.4	400	1	15	8.2	57.1	34
42	23.4	400	1	15	9.1	44	0
42	23.4	400	1	15	9.2	43.5	31
42	23.4	400	1	15	9.3	52	47
42	23.4	400	1	15	10.1	63.5	30
42	23.4	400	1	15	10.2	53.6	31
42	23.4	400	1	15	11.1	45.6	28
42	23.4	400	1	15	12.1	52	33
42	23.4	400	1	15	12.2	48	0
42	23.4	400	1	15	13.1	0	0
42	23.4	400	1	15	14.1	55.6	0
42	23.4	400	1	15	15.1	72.5	21
42	23.4	400	1	15	15.2	57.1	26
42	23.4	400	1	15	15.3	41.4	0
42	23.4	400	1	15	16.1	44	29
42	23.4	400	1	15	16.2	44.1	28
42	23.4	400	1	15	16.3	40.56	33
42	23.4	400	1	15	17.1	54.2	0
42	23.4	400	1	15	17.2	44.2	31
42	23.4	400	1	15	18.1	47	0
42	23.4	400	1	15	18.2	51.3	0
42	23.4	400	1	15	18.3	58.7	0
43	23.2	470	3	2	1.1	53.7	0
43	23.2	470	3	2	1.2	43.2	0
43	23.2	470	3	2	1.3	36.5	31
43	23.2	470	3	2	2.1	45.8	25
43	23.2	470	3	2	2.2	43	25
43	23.2	470	3	2	3.1	53	27
44	23.6	650	3	3	1.1	77.1	0
44	23.6	650	3	3	1.2	59	25
44	23.6	650	3	3	1.3	67.7	28
44	23.6	650	3	3	2.1	41.7	34
44	23.6	650	3	3	2.2	47	33
44	23.6	650	3	3	2.3	44.5	0
44	23.6	650	3	3	3.1	46	32
44	23.6	650	3	3	3.2	51	0
44	23.6	650	3	3	3.3	51	52
44	23.6	650	3	3	3.4	46.4	33
44	23.6	650	3	3	4.1	49	33
44	23.6	650	3	3	4.2	43.1	32
44	23.6	650	3	3	4.3	46.4	0
44	23.6	650	3	3	4.4	45	45
44	23.6	650	3	3	5.1	47.7	46
44	23.6	650	3	3	5.2	42.4	0
44	23.6	650	3	3	5.3	43	0
44	23.6	650	3	3	5.4	42	0
44	23.6	650	3	3	6.1	40.8	0
44	23.6	650	3	3	6.2	42	0
44	23.6	650	3	3	6.3	41.9	29
45	23.3	700	3	3	1.1	49.6	16
45	23.6	700	3	3	2.1	41	17
45	23.6	700	3	3	2.2	47	26
45	23.6	700	3	3	2.3	47	24
45	23.6	700	3	3	2.4	46	28
45	23.6	700	3	3	2.5	36.6	27
45	23.6	700	3	3	3.1	51.2	27
45	23.6	700	3	3	3.2	53.4	22
45	23.6	700	3	3	3.3	60.4	21
45	23.6	700	3	3	3.4	64.7	22
45	23.6	700	3	3	3.5	61.8	29
45	23.6	700	3	3	4.1	47.3	31
45	23.6	700	3	3	4.2	44.9	29
45	23.6	700	3	3	4.3	46.7	31
45	23.6	700	3	3	4.4	50.2	0
45	23.6	700	3	3	4.5	56.3	30
45	23.6	700	3	3	5.1	51.7	28
45	23.6	700	3	3	5.2	44.6	25
45	23.6	700	3	3	5.3	48.7	26
45	23.6	700	3	3	5.4	54.6	30
45	23.6	700	3	3	6.1	43.9	36
45	23.6	700	3	3	6.2	45.4	36
45	23.6	700	3	3	6.3	48.4	37
45	23.6	700	3	3	6.4	52.5	37
46	23.6	550	3	1	1.1	51	17
46	23.6	550	3	1	2.1	21	16
46	23.6	550	3	1	2.2	27	25
46	23.6	550	3	1	2.3	36	23
46	23.6	550	3	1	2.4	36.1	0
47	23.6	480	3	3	1.1	0	0
47	23.6	480	3	3	2.1	35.4	19
47	23.6	480	3	3	2.2	61.5	25
47	23.6	480	3	3	2.3	33.6	24
47	23.6	480	3	3	2.4	47	30
47	23.6	480	3	3	2.5	36	24
47	23.6	480	3	3	2.6	46.5	23
47	23.6	480	3	3	2.7	41	25
47	23.6	480	3	3	3.1	49.3	35
47	23.6	480	3	3	3.2	62.4	31
47	23.6	480	3	3	3.3	67.5	26
47	23.6	480	3	3	3.4	37.7	21
47	23.6	480	3	3	3.5	36	25
47	23.6	480	3	3	3.6	44.2	17
47	23.6	480	3	3	3.7	44.6	24
47	23.6	480	3	3	3.8	55	38
47	23.6	480	3	3	3.9	46	26
47	23.6	480	3	3	3.95	54	27
47	23.6	480	3	3	4.1	66	29
47	23.6	480	3	3	4.2	37.9	14
47	23.6	480	3	3	4.3	33.5	12
48	23.6	630	2	2	1.1	74.1	21
48	23.6	630	2	2	1.2	67.7	0
48	23.6	630	2	2	1.3	55	0
48	23.6	630	2	2	2.1	44.9	0
48	23.6	630	2	2	2.2	38.9	25
48	23.6	630	2	2	2.3	37.5	24
48	23.6	630	2	2	2.4	41.5	25
48	23.6	630	2	2	2.5	50.6	27
48	23.6	630	2	2	2.6	46.1	29
48	23.6	630	2	2	3.1	41.2	30
48	23.6	630	2	2	3.2	43.9	0
48	23.6	630	2	2	3.3	44.9	29
48	23.6	630	2	2	3.4	47.8	30
48	23.6	630	2	2	3.5	48.6	30
48	23.6	630	2	2	3.6	43.3	0
48	23.6	630	2	2	3.7	46	0
48	23.6	630	2	2	3.8	47	0
48	23.6	630	2	2	4.1	49	0
48	23.6	630	2	2	4.2	47	0
48	23.6	630	2	2	4.3	51.9	29
48	23.6	630	2	2	4.4	47.9	28
48	23.6	630	2	2	4.5	51.9	0
48	23.6	630	2	2	4.6	53.4	0
48	23.6	630	2	2	4.7	45.5	36
48	23.6	630	2	2	4.8	49	29
48	23.6	630	2	2	5.1	51	28
48	23.6	630	2	2	5.2	50	29
48	23.6	630	2	2	5.3	57.2	34
48	23.6	630	2	2	5.4	72	24
48	23.6	630	2	2	5.5	54.1	34
49	23.2	525	3	3	2.1	38.6	24
49	23.2	525	3	3	2.2	52.7	29
49	23.2	525	3	3	2.3	45	22
49	23.2	525	3	3	2.4	48.6	31
49	23.2	525	3	3	2.5	38.4	20
49	23.2	525	3	3	2.6	38	28
49	23.2	525	3	3	3.1	33	26
49	23.2	525	3	3	3.2	47	27
49	23.2	525	3	3	3.3	45	29
49	23.2	525	3	3	3.4	44	30
49	23.2	525	3	3	3.5	48.3	39
49	23.2	525	3	3	3.6	38.3	42
49	23.2	525	3	3	3.7	41.2	36
49	23.2	525	3	3	3.8	44.6	36
49	23.2	525	3	3	3.9	37.6	33
49	23.2	525	3	3	4.1	39.9	29
49	23.2	525	3	3	4.2	52	28
49	23.2	525	3	3	4.3	34	28
49	23.2	525	3	3	4.4	35	27
49	23.2	525	3	3	4.5	50.5	28
49	23.2	525	3	3	5.1	36.1	26
49	23.2	525	3	3	5.2	34.8	27
49	23.2	525	3	3	5.3	37.4	29
49	23.2	525	3	3	5.4	48	0
49	23.2	525	3	3	5.5	53.5	29
49	23.2	525	3	3	6.1	42.7	28
49	23.2	525	3	3	6.2	51.3	31
50	23.1	450	2	5	2.1	36.8	23
50	23.1	450	2	5	2.2	40.2	36
50	23.1	450	2	5	2.3	38	31
50	23.1	450	2	5	2.4	57.3	23
50	23.1	450	2	5	2.5	50.5	20
50	23.1	450	2	5	3.1	45	20
50	23.1	450	2	5	3.2	41	25
50	23.1	450	2	5	3.3	48	26
50	23.1	450	2	5	3.4	44	28
50	23.1	450	2	5	3.5	62	26
50	23.1	450	2	5	3.6	45.3	29
50	23.1	450	2	5	3.7	42.2	0
50	23.1	450	2	5	4.1	41	24
50	23.1	450	2	5	4.2	39	31
50	23.1	450	2	5	4.3	45	31
50	23.1	450	2	5	4.4	46.2	23
50	23.1	450	2	5	5.1	48	33
50	23.1	450	2	5	5.2	42	30
50	23.1	450	2	5	5.3	48	30
50	23.1	450	2	5	5.4	49.1	34
50	23.1	450	2	5	5.5	48	31
50	23.1	450	2	5	6.1	47.1	34
50	23.1	450	2	5	6.2	57.6	30
50	23.1	450	2	5	6.3	53.4	29
50	23.1	450	2	5	6.4	57.4	0
50	23.1	450	2	5	7.1	58.8	0
50	23.1	450	2	5	7.2	53	36
50	23.1	450	2	5	7.3	75	0
50	23.1	450	2	5	7.4	68	0
50	23.1	450	2	5	7.5	67	27
50	23.1	450	2	5	8.1	70.7	0
50	23.1	450	2	5	8.2	67.8	0
50	23.1	450	2	5	8.3	66	34
50	23.1	450	2	5	8.4	65	0
51	23.6	530	2	3	1.1	45.4	19
51	23.6	530	2	3	1.2	49.4	23
51	23.6	530	2	3	1.3	67.1	25
51	23.6	530	2	3	1.4	49.6	21
51	23.6	530	2	3	1.5	58.7	26
51	23.6	530	2	3	1.6	48.3	27
51	23.6	530	2	3	2.1	47	0
51	23.6	530	2	3	2.2	50	25
51	23.6	530	2	3	2.3	50.2	27
51	23.6	530	2	3	2.4	38.3	29
51	23.6	530	2	3	2.5	41	32
51	23.6	530	2	3	2.6	46.1	34
51	23.6	530	2	3	3.1	49.9	37
51	23.6	530	2	3	3.2	43.3	34
51	23.6	530	2	3	4.1	41.3	32
51	23.6	530	2	3	4.2	35.6	28
51	23.6	530	2	3	4.3	42.3	28
51	23.6	530	2	3	5.1	43.9	38
51	23.6	530	2	3	5.2	43.8	35
51	23.6	530	2	3	6.1	41	31
51	23.6	530	2	3	6.2	44	0
52	23.6	555	2	3	1.1	42	41
52	23.6	555	2	3	1.2	49	0
52	23.6	555	2	3	1.3	30.7	0
52	23.6	555	2	3	1.4	44	31
52	23.6	555	2	3	1.5	34	33
52	23.6	555	2	3	2.1	46	28
52	23.6	555	2	3	2.2	41.5	36
52	23.6	555	2	3	2.3	37	33
52	23.6	555	2	3	2.4	39.9	32
52	23.6	555	2	3	3.1	44.2	37
52	23.6	555	2	3	3.2	34.8	41
52	23.6	555	2	3	4.1	43.9	30
52	23.6	555	2	3	4.2	37	0
52	23.6	555	2	3	5.1	34.6	40
52	23.6	555	2	3	5.2	36.7	0
52	23.6	555	2	3	5.3	54	47
52	23.6	555	2	3	5.4	39.4	0
52	23.6	555	2	3	6.1	44.4	0
52	23.6	555	2	3	6.2	36.8	38
52	23.6	555	2	3	6.3	43	28
52	23.6	555	2	3	6.4	41.1	0
52	23.6	555	2	3	6.5	38.1	22
53	23.6	470	2	4	1.1	51	55
53	23.6	470	2	4	1.2	44.3	28
53	23.6	470	2	4	1.3	49.4	25
53	23.6	470	2	4	2.1	42.4	24
53	23.6	470	2	4	2.2	50.2	21
53	23.6	470	2	4	2.3	62.6	23
53	23.6	470	2	4	2.4	73.6	26
53	23.6	470	2	4	2.5	71.7	20
53	23.6	470	2	4	2.6	48.8	21
53	23.6	470	2	4	2.7	53.4	24
53	23.6	470	2	4	2.8	51	30
53	23.6	470	2	4	3.1	53.1	24
53	23.6	470	2	4	3.2	55.9	27
53	23.6	470	2	4	3.3	40.6	27
53	23.6	470	2	4	3.4	43	31
53	23.6	470	2	4	4.1	52.6	26
53	23.6	470	2	4	4.2	35.1	29
53	23.6	470	2	4	4.3	36.3	0
53	23.6	470	2	4	4.4	34	30
53	23.6	470	2	4	4.5	41	28
53	23.6	470	2	4	5.1	46.4	26
53	23.6	470	2	4	5.2	40.5	26
53	23.6	470	2	4	5.3	40	38
53	23.6	470	2	4	5.4	55	41
53	23.6	470	2	4	6.1	37	51
53	23.6	470	2	4	6.2	45	0
53	23.6	470	2	4	6.3	56	39
53	23.6	470	2	4	6.4	51.5	0
53	23.6	470	2	4	7.1	39	0
53	23.6	470	2	4	7.2	41.9	0
53	23.6	470	2	4	7.3	49.2	0
54	23.5	540	2	7	1.1	36	16
54	23.5	540	2	7	1.2	27.2	18
54	23.5	540	2	7	1.3	35.5	21
54	23.5	540	2	7	2.1	32.1	31
54	23.5	540	2	7	2.2	40.9	29
54	23.5	540	2	7	2.3	53.3	31
54	23.5	540	2	7	3.1	42.7	33
54	23.5	540	2	7	3.2	33	33
54	23.5	540	2	7	3.3	42.8	31
54	23.5	540	2	7	4.1	37.2	30
54	23.5	540	2	7	4.2	34.6	32
54	23.5	540	2	7	4.3	35.8	0
54	23.5	540	2	7	5.1	35.2	33
54	23.5	540	2	7	5.2	33.8	36
54	23.5	540	2	7	5.3	36.3	31
54	23.5	540	2	7	6.1	37.6	36
54	23.5	540	2	7	6.2	35.1	0
54	23.5	540	2	7	7.1	33.6	0
54	23.5	540	2	7	7.2	35.2	0
54	23.5	540	2	7	8.1	34.3	41
54	23.5	540	2	7	9.1	40.5	34
54	23.5	540	2	7	9.2	39.9	36
54	23.5	540	2	7	9.3	39.9	0
54	23.5	540	2	7	10.1	38.7	0
54	23.5	540	2	7	10.2	38.4	0
54	23.5	540	2	7	10.3	38	32
55	24.3	630	3	1	1.1	48.4	22
55	24.3	630	3	1	1.2	42	24
55	24.3	630	3	1	2.1	39.5	35
55	24.3	630	3	1	2.2	34.4	36
55	24.3	630	3	1	2.3	28.8	32
55	24.3	630	3	1	3.1	36.5	33
55	24.3	630	3	1	3.2	21.7	0
55	24.3	630	3	1	3.3	42.7	0
55	24.3	630	3	1	4.1	43.4	0
55	24.3	630	3	1	5.1	38.7	0
55	24.3	630	3	1	6.1	53.3	0
55	24.3	630	3	1	7.1	46.9	0
55	24.3	630	3	1	8.1	51.1	0
55	24.3	630	3	1	8.2	50	0
56	24.0	610	3	3	1.1	0	0
56	24.0	610	3	3	2.1	38	32
56	24.0	610	3	3	2.2	34.6	29
56	24.0	610	3	3	3.1	32.1	0
56	24.0	610	3	3	3.2	34.3	0
56	24.0	610	3	3	3.3	33.3	0
56	24.0	610	3	3	3.4	30.1	30
56	24.0	610	3	3	3.5	34.7	26
56	24.0	610	3	3	3.6	33.9	31
56	24.0	610	3	3	3.7	63.3	23
56	24.0	610	3	3	4.1	45.6	32
56	24.0	610	3	3	4.2	39	30
56	24.0	610	3	3	4.3	35.5	24
56	24.0	610	3	3	4.4	35.2	28
56	24.0	610	3	3	4.5	36.5	29
57	24.0	440	2	3	1.1	46.5	0
57	24.0	440	2	3	1.2	43.9	25
57	24.0	440	2	3	2.1	49.1	28
57	24.0	440	2	3	2.2	33.8	0
57	24.0	440	2	3	2.3	51	33
57	24.0	440	2	3	3.1	43.5	35
57	24.0	440	2	3	3.2	41.7	31
57	24.0	440	2	3	3.3	38.5	23
57	24.0	440	2	3	3.4	41.4	24
57	24.0	440	2	3	3.5	51.6	20
57	24.0	440	2	3	3.6	44	30
57	24.0	440	2	3	4.1	47.6	25
57	24.0	440	2	3	4.2	40.5	23
57	24.0	440	2	3	4.3	36.4	20
57	24.0	440	2	3	4.4	35.2	19
57	24.0	440	2	3	4.5	36.4	20
57	24.0	440	2	3	4.6	40	17
57	24.0	440	2	3	4.7	41	19
57	24.0	440	2	3	4.8	42	29
57	24.0	440	2	3	5.1	45	25
57	24.0	440	2	3	5.2	48.4	24
57	24.0	440	2	3	5.3	41.8	0
57	24.0	440	2	3	5.4	43.7	27
57	24.0	440	2	3	5.5	60.5	36
57	24.0	440	2	3	5.6	38.8	27
57	24.0	440	2	3	5.7	16.2	25
57	24.0	440	2	3	5.8	42	33
57	24.0	440	2	3	6.1	39	31
57	24.0	440	2	3	6.2	48.4	24
57	24.0	440	2	3	6.3	41.8	0
57	24.0	440	2	3	6.4	43.7	27
57	24.0	440	2	3	6.5	50.9	28
57	24.0	440	2	3	6.6	60.5	0
57	24.0	440	2	3	6.7	38.8	27
57	24.0	440	2	3	6.8	16.2	25
57	24.0	440	2	3	6.9	37.4	0
57	24.0	440	2	3	6.95	42	33
57	24.0	440	2	3	7.1	45	37
57	24.0	440	2	3	7.2	42	0
57	24.0	440	2	3	7.3	38.4	0
57	24.0	440	2	3	7.4	50.8	32
58	24.3	830	3	1	1.1	53.4	0
58	24.3	830	3	1	1.2	39.6	28
58	24.3	830	3	1	2.1	30.8	28
58	24.3	830	3	1	2.2	39.3	25
58	24.3	830	3	1	2.3	32.1	26
58	24.3	830	3	1	2.4	34.2	20
58	24.3	830	3	1	2.5	36.1	15
58	24.3	830	3	1	2.6	34.3	22
58	24.3	830	3	1	2.7	48.6	22
58	24.3	830	3	1	2.8	56.2	19
58	24.3	830	3	1	2.9	67	20
58	24.3	830	3	1	3.1	62.9	27
58	24.3	830	3	1	3.2	57	31
58	24.3	830	3	1	3.3	48	30
58	24.3	830	3	1	3.4	40.9	36
58	24.3	830	3	1	4.1	32.5	38
58	24.3	830	3	1	4.2	41.1	37
58	24.3	830	3	1	4.3	40.5	35
58	24.3	830	3	1	4.4	39.9	41
59	24.4	740	2	4	1.1	44.4	26
59	24.4	740	2	4	2.1	61.4	24
59	24.4	740	2	4	2.2	43.8	28
59	24.4	740	2	4	2.3	42.7	22
59	24.4	740	2	4	2.4	43.3	27
59	24.4	740	2	4	2.5	43.6	26
59	24.4	740	2	4	3.1	36.7	25
59	24.4	740	2	4	3.2	47.9	33
59	24.4	740	2	4	3.3	42	28
59	24.4	740	2	4	3.4	46	34
59	24.4	740	2	4	3.5	41.7	42
59	24.4	740	2	4	4.1	40	0
59	24.4	740	2	4	4.2	33.4	43
59	24.4	740	2	4	4.3	44	36
59	24.4	740	2	4	5.1	33.7	0
59	24.4	740	2	4	5.2	49.2	0
59	24.4	740	2	4	5.3	62.3	32
59	24.4	740	2	4	5.4	49.3	26
59	24.4	740	2	4	6.1	50.7	27
59	24.4	740	2	4	6.2	42.9	0
59	24.4	740	2	4	6.3	46	0
59	24.4	740	2	4	6.4	47.8	0
59	24.4	740	2	4	7.1	45.1	32
59	24.4	740	2	4	7.2	41.1	0
59	24.4	740	2	4	7.3	43	0
60	24.0	470	2	4	1.1	50.8	0
60	24.0	470	2	4	1.2	40.8	0
60	24.0	470	2	4	1.3	37.5	22
60	24.0	470	2	4	1.4	44.6	20
60	24.0	470	2	4	2.1	42.2	0
60	24.0	470	2	4	2.2	44.6	22
60	24.0	470	2	4	2.3	41.5	24
60	24.0	470	2	4	2.4	42	24
60	24.0	470	2	4	2.5	48	29
60	24.0	470	2	4	2.6	46	30
60	24.0	470	2	4	2.7	33	36
60	24.0	470	2	4	2.8	45.6	29
60	24.0	470	2	4	3.1	55.2	28
60	24.0	470	2	4	3.2	53.9	31
60	24.0	470	2	4	3.3	46.8	0
60	24.0	470	2	4	3.4	50.1	31
60	24.0	470	2	4	3.5	43	0
60	24.0	470	2	4	4.1	40	29
60	24.0	470	2	4	4.2	47.5	0
60	24.0	470	2	4	4.3	49.1	0
60	24.0	470	2	4	4.4	44.4	0
60	24.0	470	2	4	4.5	43	0
60	24.0	470	2	4	5.1	51.2	0
60	24.0	470	2	4	5.2	46.9	0
60	24.0	470	2	4	5.3	44.8	0
60	24.0	470	2	4	6.1	47.4	48
60	24.0	470	2	4	6.2	45	0
60	24.0	470	2	4	6.3	48.3	0
60	24.0	470	2	4	7.1	58	0
60	24.0	470	2	4	7.2	56.7	0
61	24.5	745	1	9	2.1	44.2	27
61	24.5	745	1	9	2.2	57.7	0
61	24.5	745	1	9	2.3	28.7	0
61	24.5	745	1	9	2.4	39.6	0
61	24.5	745	1	9	3.1	55.1	0
61	24.5	745	1	9	3.2	35.8	0
61	24.5	745	1	9	3.3	42.7	0
61	24.5	745	1	9	4.1	50.3	0
61	24.5	745	1	9	4.2	37.8	29
61	24.5	745	1	9	5.1	39.4	28
61	24.5	745	1	9	5.2	36.7	37
61	24.5	745	1	9	5.3	34.3	0
61	24.5	745	1	9	6.1	32	32
61	24.5	745	1	9	6.2	29.6	0
61	24.5	745	1	9	6.3	34.4	0
61	24.5	745	1	9	6.4	33	39
61	24.5	745	1	9	7.1	40.2	41
61	24.5	745	1	9	7.2	47.4	0
61	24.5	745	1	9	8.1	56	0
61	24.5	745	1	9	9.1	58	50
61	24.5	745	1	9	10.1	54.2	41
61	24.5	745	1	9	10.2	54.6	0
61	24.5	745	1	9	11.1	55	0
61	24.5	745	1	9	12.1	54.1	33
62	24.2	690	4	2	1.1	43.9	22
62	24.2	690	4	2	1.2	60.8	23
62	24.2	690	4	2	1.3	51.7	22
62	24.2	690	4	2	1.4	52.2	28
62	24.2	690	4	2	2.1	52.1	33
62	24.2	690	4	2	2.2	55.1	31
62	24.2	690	4	2	2.3	67.8	30
62	24.2	690	4	2	3.1	59	35
62	24.2	690	4	2	3.2	66.8	33
62	24.2	690	4	2	3.3	50.9	33
62	24.2	690	4	2	4.1	40.8	27
62	24.2	690	4	2	4.2	44.6	40
62	24.2	690	4	2	4.3	46.4	33
62	24.2	690	4	2	5.1	53	0
62	24.2	690	4	2	5.2	48.3	35
62	24.2	690	4	2	5.3	54.2	33
63	24.2	680	3	2	1.1	36.5	25
63	24.2	680	3	2	1.2	54.1	24
63	24.2	680	3	2	1.3	46.9	22
63	24.2	680	3	2	1.4	56.2	20
63	24.2	680	3	2	1.5	33.6	22
63	24.2	680	3	2	2.1	38.4	30
63	24.2	680	3	2	2.2	37.1	30
63	24.2	680	3	2	2.3	61	0
63	24.2	680	3	2	2.4	82.2	39
63	24.2	680	3	2	2.5	71	0
63	24.2	680	3	2	2.6	48.6	41
63	24.2	680	3	2	2.7	52.4	41
63	24.2	680	3	2	3.1	49.5	0
63	24.2	680	3	2	3.2	37.2	41
63	24.2	680	3	2	3.3	36.8	38
63	24.2	680	3	2	3.4	35.1	0
63	24.2	680	3	2	4.1	37.5	90
63	24.2	680	3	2	4.2	43	35
63	24.2	680	3	2	4.3	32	42
63	24.2	680	3	2	5.1	53.1	49
63	24.2	680	3	2	5.2	43.5	48
63	24.2	680	3	2	5.3	49.1	43
63	24.2	680	3	2	5.4	45	48
64	24.1	610	2	4	1.1	69.6	32
64	24.1	610	2	4	1.2	77.8	0
64	24.1	610	2	4	1.3	44.4	0
64	24.1	610	2	4	1.4	54.4	30
64	24.1	610	2	4	1.5	51.8	31
64	24.1	610	2	4	2.1	52.2	31
64	24.1	610	2	4	2.2	51.4	30
64	24.1	610	2	4	2.3	50.7	33
64	24.1	610	2	4	2.4	55.4	31
64	24.1	610	2	4	2.5	48.9	29
64	24.1	610	2	4	2.6	50.7	32
64	24.1	610	2	4	3.1	51.7	35
64	24.1	610	2	4	3.2	50	33
64	24.1	610	2	4	3.3	54.6	35
64	24.1	610	2	4	4.1	54.3	36
64	24.1	610	2	4	4.2	51	38
64	24.1	610	2	4	4.3	66.9	0
64	24.1	610	2	4	4.4	53.1	0
64	24.1	610	2	4	4.5	52.2	24
64	24.1	610	2	4	4.6	59.1	27
64	24.1	610	2	4	4.7	55.6	32
64	24.1	610	2	4	4.8	43.9	0
64	24.1	610	2	4	4.9	48.5	0
64	24.1	610	2	4	4.95	63.4	34
64	24.1	610	2	4	5.1	61	38
64	24.1	610	2	4	5.2	64.5	0
65	24.6	670	1	13	6.1	61.6	36
65	24.6	670	1	13	6.2	60.3	0
65	24.6	670	1	13	7.1	59.2	42
65	24.6	670	1	13	7.2	65	35
65	24.6	670	1	13	7.3	63	0
65	24.6	670	1	13	7.4	75.5	0
65	24.6	670	1	13	8.1	82	0
65	24.6	670	1	13	8.2	72.3	0
65	24.6	670	1	13	8.3	70.6	0
65	24.6	670	1	13	8.4	70.1	0
65	24.6	670	1	13	9.1	64.3	41
65	24.6	670	1	13	9.2	69.6	46
65	24.6	670	1	13	9.3	78.3	0
65	24.6	670	1	13	9.4	68.3	52
65	24.6	670	1	13	10.1	75.6	0
65	24.6	670	1	13	11.1	74.1	45
65	24.6	670	1	13	11.2	65	44
65	24.6	670	1	13	12.1	72.8	32
65	24.6	670	1	13	12.2	74.2	41
65	24.6	670	1	13	13.1	62	56
65	24.6	670	1	13	13.2	63	0
65	24.6	670	1	13	13.3	64.8	48
65	24.6	670	1	13	14.1	66	44
65	24.6	670	1	13	14.2	67.2	0
65	24.6	670	1	13	15.1	67.9	0
65	24.6	670	1	13	15.2	71	68
65	24.6	670	1	13	15.3	73.4	33
65	24.6	670	1	13	16.1	80.5	0
65	24.6	670	1	13	16.2	80.4	0
65	24.6	670	1	13	16.3	68.4	45
66	24.4	760	1	1	1.1	60.4	32
66	24.4	760	1	1	1.2	148	18
67	24.5	490	2	15	8.1	64.2	0
67	24.5	490	2	15	8.2	67	0
67	24.5	490	2	15	9.1	67.3	0
67	24.5	490	2	15	9.2	75.5	0
67	24.5	490	2	15	9.3	65	0
67	24.5	490	2	15	10.1	54.8	33
67	24.5	490	2	15	11.1	68.7	34
67	24.5	490	2	15	11.2	65	0
67	24.5	490	2	15	11.3	63.5	48
67	24.5	490	2	15	12.1	53	37
67	24.5	490	2	15	12.2	55.4	37
67	24.5	490	2	15	13.1	50.6	35
67	24.5	490	2	15	13.2	51	0
67	24.5	490	2	15	13.3	46.6	0
67	24.5	490	2	15	13.4	44.4	0
67	24.5	490	2	15	14.1	44	0
67	24.5	490	2	15	14.2	44.3	34
67	24.5	490	2	15	14.3	36.6	0
67	24.5	490	2	15	15.1	45.8	0
67	24.5	490	2	15	15.2	52.5	0
67	24.5	490	2	15	15.3	48.5	39
67	24.5	490	2	15	16.1	55.5	47
67	24.5	490	2	15	17.1	61.9	0
67	24.5	490	2	15	18.1	58	0
68	24.4	680	2	4	1.1	44.1	29
68	24.4	680	2	4	2.1	31.5	25
68	24.4	680	2	4	2.2	43.5	24
68	24.4	680	2	4	2.3	44.6	29
68	24.4	680	2	4	2.4	50	28
68	24.4	680	2	4	2.5	54.8	26
68	24.4	680	2	4	2.6	52.9	34
68	24.4	680	2	4	3.1	43.8	23
68	24.4	680	2	4	3.2	41.3	36
68	24.4	680	2	4	3.3	46.2	36
68	24.4	680	2	4	3.4	32.8	34
68	24.4	680	2	4	3.5	49	46
68	24.4	680	2	4	4.1	30.7	41
68	24.4	680	2	4	4.2	47.5	31
68	24.4	680	2	4	4.3	42.4	32
68	24.4	680	2	4	4.4	36.9	33
68	24.4	680	2	4	5.1	49	0
68	24.4	680	2	4	5.2	47.7	0
68	24.4	680	2	4	5.3	51.53	31
68	24.4	680	2	4	5.4	45.5	29
68	24.4	680	2	4	6.1	46.1	32
68	24.4	680	2	4	6.2	49.11	27
68	24.4	680	2	4	6.3	51.7	24
68	24.4	680	2	4	6.4	47.3	31
68	24.4	680	2	4	7.1	52.2	29
68	24.4	680	2	4	7.2	48.3	33
68	24.4	680	2	4	7.3	61.7	0
68	24.4	680	2	4	7.4	41	34
69	24.3	600	2	3	1.1	0	0
69	24.3	600	2	3	2.1	44.5	0
69	24.3	600	2	3	2.2	43.3	0
69	24.3	600	2	3	2.3	43	0
69	24.3	600	2	3	2.4	50.8	0
69	24.3	600	2	3	2.5	46	0
69	24.3	600	2	3	2.6	51.3	0
69	24.3	600	2	3	3.1	46.4	0
69	24.3	600	2	3	3.2	35	0
69	24.3	600	2	3	4.1	46.4	0
69	24.3	600	2	3	4.2	35	0
69	24.3	600	2	3	5.1	53.7	0
69	24.3	600	2	3	5.2	37	0
69	24.3	600	2	3	6.1	44.7	0
69	24.3	600	2	3	6.2	47.3	0
70	24.4	750	4	3	1.1	42.1	29
70	24.4	750	4	3	1.2	41.6	28
70	24.4	750	4	3	1.3	38.8	30
70	24.4	750	4	3	1.4	46	30
70	24.4	750	4	3	2.1	45	31
70	24.4	750	4	3	2.2	42.2	26
70	24.4	750	4	3	2.3	45.6	32
70	24.4	750	4	3	2.4	46	36
70	24.4	750	4	3	3.1	53	39
70	24.4	750	4	3	3.2	80	39
70	24.4	750	4	3	3.3	82.9	36
71	24.6	720	2	3	2.1	48.7	0
71	24.6	720	2	3	2.2	44.6	21
71	24.6	720	2	3	2.3	37.1	13
71	24.6	720	2	3	2.4	45.1	30
71	24.6	720	2	3	2.5	41.7	29
71	24.6	720	2	3	3.1	45.1	26
71	24.6	720	2	3	3.2	38.1	30
71	24.6	720	2	3	3.3	41.3	43
71	24.6	720	2	3	4.1	47.7	36
71	24.6	720	2	3	4.2	28.8	36
71	24.6	720	2	3	5.1	66	34
71	24.6	720	2	3	5.2	66.9	0
71	24.6	720	2	3	6.1	72.5	0
71	24.6	720	2	3	6.2	67	0
72	25.4	990	1	4	1.1	47	44
72	25.4	990	1	4	1.2	53	49
72	25.4	990	1	4	1.3	53	49
72	25.4	990	1	4	1.4	62	58
72	25.4	990	1	4	1.5	54	55
72	25.4	990	1	4	2.1	57	51
72	25.4	990	1	4	2.2	58	50
72	25.4	990	1	4	2.3	63	44
72	25.4	990	1	4	2.4	58	43
72	25.4	990	1	4	2.5	46	38
72	25.4	990	1	4	2.6	49.1	36
72	25.4	990	1	4	2.7	67.2	33
72	25.4	990	1	4	2.8	48	41
72	25.4	990	1	4	2.9	42	0
72	25.4	990	1	4	2.95	52	49
72	25.4	990	1	4	3.1	57	36
72	25.4	990	1	4	3.2	51	0
72	25.4	990	1	4	3.3	35.4	43
72	25.4	990	1	4	3.4	51.9	41
72	25.4	990	1	4	3.5	51.7	49
72	25.4	990	1	4	3.6	44	0
72	25.4	990	1	4	3.7	53	0
72	25.4	990	1	4	4.1	49	38
72	25.4	990	1	4	4.2	56	39
72	25.4	990	1	4	4.3	69	40
72	25.4	990	1	4	4.4	59.6	40
72	25.4	990	1	4	5.1	55	35
72	25.4	990	1	4	5.2	61.4	38
72	25.4	990	1	4	5.3	62.4	35
72	25.4	990	1	4	5.4	58.8	44
72	25.4	990	1	4	5.5	64	38
72	25.4	990	1	4	5.6	64	0
72	25.4	990	1	4	5.7	44.9	34
72	25.4	990	1	4	6.1	51	36
72	25.4	990	1	4	6.2	69.2	0
72	25.4	990	1	4	6.3	70.3	33
72	25.4	990	1	4	6.4	63.4	40
72	25.4	990	1	4	7.1	61	44
72	25.4	990	1	4	7.2	47	0
72	25.4	990	1	4	7.3	46	37
72	25.4	990	1	4	8.1	58	38
72	25.4	990	1	4	8.2	56	39
72	25.4	990	1	4	8.3	59	0
72	25.4	990	1	4	8.4	61.6	0
72	25.4	990	1	4	9.1	59	36
72	25.4	990	1	4	9.2	66.7	0
73	25.6	640	3	1	1.1	37.1	27
73	25.6	640	3	1	1.2	52.5	28
73	25.6	640	3	1	1.3	48.6	34
73	25.6	640	3	1	2.1	42.7	32
73	25.6	640	3	1	2.2	44.6	0
73	25.6	640	3	1	2.3	38.4	38
73	25.6	640	3	1	3.1	31.5	39
73	25.6	640	3	1	3.2	46	34
73	25.6	640	3	1	3.3	36	33
73	25.6	640	3	1	4.1	42.8	38
73	25.6	640	3	1	4.2	42.9	0
73	25.6	640	3	1	4.3	42	27
74	25.6	740	2	4	1.1	33.8	24
74	25.6	740	2	4	1.2	38	0
74	25.6	740	2	4	1.3	41	27
74	25.6	740	2	4	1.4	38	27
74	25.6	740	2	4	1.5	48	27
74	25.6	740	2	4	1.6	33.9	31
74	25.6	740	2	4	2.1	37.5	33
74	25.6	740	2	4	2.2	35	30
74	25.6	740	2	4	2.3	37	38
74	25.6	740	2	4	2.4	35.2	0
74	25.6	740	2	4	2.5	43.6	36
74	25.6	740	2	4	2.6	45	34
74	25.6	740	2	4	2.7	56	36
74	25.6	740	2	4	3.1	47.1	43
74	25.6	740	2	4	3.2	52	0
74	25.6	740	2	4	3.2	49	0
74	25.6	740	2	4	3.3	45	39
74	25.6	740	2	4	3.4	40.8	0
74	25.6	740	2	4	3.5	39.1	34
74	25.6	740	2	4	3.6	46.1	36
74	25.6	740	2	4	3.7	45.9	37
74	25.6	740	2	4	4.1	39	37
74	25.6	740	2	4	4.2	41.8	0
74	25.6	740	2	4	4.3	41.9	38
74	25.6	740	2	4	4.4	46	35
74	25.6	740	2	4	5.1	44.8	42
74	25.6	740	2	4	5.2	44.9	42
74	25.6	740	2	4	5.3	43.9	30
74	25.6	740	2	4	5.4	33.3	0
74	25.6	740	2	4	6.1	48.7	38
74	25.6	740	2	4	6.2	42.5	0
74	25.6	740	2	4	6.3	46	27
74	25.6	740	2	4	6.4	40.4	0
74	25.6	740	2	4	7.1	36.2	65
74	25.6	740	2	4	7.2	34.7	0
75	25.3	650	3	10	2.1	44	0
75	25.3	650	3	10	3.1	61.6	34
75	25.3	650	3	10	3.2	46.1	0
75	25.3	650	3	10	3.3	38.5	33
75	25.3	650	3	10	4.1	42.8	0
75	25.3	650	3	10	4.2	44.1	32
75	25.3	650	3	10	5.1	44.3	0
75	25.3	650	3	10	5.2	48.4	39
75	25.3	650	3	10	6.1	49.9	0
75	25.3	650	3	10	6.2	52.6	0
75	25.3	650	3	10	7.1	50.1	40
75	25.3	650	3	10	7.2	49.4	0
75	25.3	650	3	10	8.1	49.2	30
75	25.3	650	3	10	8.2	53.3	27
75	25.3	650	3	10	8.3	55.2	0
75	25.3	650	3	10	9.1	47	39
75	25.3	650	3	10	9.2	57.3	30
75	25.3	650	3	10	9.3	70.2	40
75	25.3	650	3	10	9.4	64.3	36
75	25.3	650	3	10	10.1	65	0
75	25.3	650	3	10	10.2	47.2	0
75	25.3	650	3	10	10.3	66.7	35
75	25.3	650	3	10	11.1	61	30
75	25.3	650	3	10	11.2	67	0
75	25.3	650	3	10	11.3	62.5	0
75	25.3	650	3	10	12.1	67.1	31
75	25.3	650	3	10	12.2	61.4	39
75	25.3	650	3	10	12.2	57.5	0
75	25.3	650	3	10	13.1	65.2	30
75	25.3	650	3	10	13.2	65.2	0
76	25.1	690	3	1	1.1	0	0
76	25.1	690	3	1	2.1	57	26
76	25.1	690	3	1	2.2	46.6	0
76	25.1	690	3	1	2.3	42.9	32
76	25.1	690	3	1	3.1	47.8	29
76	25.1	690	3	1	3.2	50.3	0
76	25.1	690	3	1	4.1	39	0
77	25.5	850	2	4	1.1	59.6	0
77	25.5	850	2	4	2.1	52.1	37
77	25.5	850	2	4	2.2	39.4	0
77	25.5	850	2	4	3.1	48	0
77	25.5	850	2	4	3.2	42	0
77	25.5	850	2	4	3.3	47.2	26
77	25.5	850	2	4	4.1	38.6	0
77	25.5	850	2	4	5.1	40.9	0
77	25.5	850	2	4	6.1	44.3	0
77	25.5	850	2	4	6.2	37	46
77	25.5	850	2	4	7.1	46.7	0
78	25.0	630	1	2	1.1	50	0
78	25.0	630	1	2	1.2	53.8	33
78	25.0	630	1	2	2.1	32	23
78	25.0	630	1	2	2.2	38	33
78	25.0	630	1	2	2.3	63.2	28
78	25.0	630	1	2	2.4	48	23
78	25.0	630	1	2	2.5	52	33
78	25.0	630	1	2	2.6	49	43
78	25.0	630	1	2	2.7	99	33
79	25.5	760	2	14	7.1	50.7	0
79	25.5	760	2	14	7.2	51.7	0
79	25.5	760	2	14	8.1	55.7	0
79	25.5	760	2	14	8.2	49.4	42
79	25.5	760	2	14	8.3	61.1	0
79	25.5	760	2	14	9.1	53.6	41
79	25.5	760	2	14	9.2	53.8	0
79	25.5	760	2	14	10.1	54.6	0
79	25.5	760	2	14	11.1	48.1	48
79	25.5	760	2	14	12.1	50.2	0
79	25.5	760	2	14	13.1	53.9	37
79	25.5	760	2	14	14.1	57.9	0
79	25.5	760	2	14	15.1	55.7	35
79	25.5	760	2	14	16.1	54	0
79	25.5	760	2	14	16.2	59	59
80	25.5	735	1	3	1.1	0	0
80	25.5	735	1	3	2.1	49.1	23
80	25.5	735	1	3	2.2	46.4	26
80	25.5	735	1	3	2.3	40.4	24
80	25.5	735	1	3	2.4	42.1	30
80	25.5	735	1	3	3.1	55.7	31
80	25.5	735	1	3	3.2	47.9	29
80	25.5	735	1	3	4.1	46.4	31
80	25.5	735	1	3	4.2	55.6	34
80	25.5	735	1	3	4.3	50.8	37
80	25.5	735	1	3	4.4	59.4	38
80	25.5	735	1	3	5.1	49.2	30
80	25.5	735	1	3	5.2	54.1	40
80	25.5	735	1	3	6.1	60.5	36
80	25.5	735	1	3	6.2	59.9	0
80	25.5	735	1	3	6.3	61.5	32
81	25.4	670	1	2	1.1	42.4	26
81	25.4	670	1	2	2.1	58	26
81	25.4	670	1	2	2.2	54	23
81	25.4	670	1	2	2.3	42	23
81	25.4	670	1	2	2.4	36.2	27
81	25.4	670	1	2	2.5	35.4	28
81	25.4	670	1	2	2.6	52	32
81	25.4	670	1	2	2.7	47	31
81	25.4	670	1	2	3.1	52	31
81	25.4	670	1	2	3.2	47.3	0
81	25.4	670	1	2	3.3	42.7	33
81	25.4	670	1	2	4.1	50.1	37
81	25.4	670	1	2	4.2	44.5	0
81	25.4	670	1	2	4.4	43.6	32
81	25.4	670	1	2	5.1	42.5	31
81	25.4	670	1	2	5.2	40.7	0
82	25.2	730	2	3	1.1	35	0
82	25.2	730	2	3	1.2	44.3	27
82	25.2	730	2	3	2.1	48	27
82	25.2	730	2	3	2.2	53.1	27
82	25.2	730	2	3	2.3	45	29
82	25.2	730	2	3	3.1	49.5	36
82	25.2	730	2	3	3.3	51.9	37
82	25.2	730	2	3	3.4	52.8	36
82	25.2	730	2	3	3.5	40.8	37
82	25.2	730	2	3	3.6	41.3	33
82	25.2	730	2	3	4.1	47	45
82	25.2	730	2	3	4.2	44.9	0
82	25.2	730	2	3	4.3	48.1	50
82	25.2	730	2	3	4.4	39.9	35
82	25.2	730	2	3	5.1	46.7	32
82	25.2	730	2	3	5.2	48.3	0
82	25.2	730	2	3	6.1	45.6	40
82	25.2	730	2	3	6.2	47.4	0
83	25.3	900	4	2	1.1	46.3	55
83	25.3	900	4	2	1.2	48.6	0
83	25.3	900	4	2	1.3	54.6	15
83	25.3	900	4	2	1.4	45.7	24
83	25.3	900	4	2	1.5	50.4	21
83	25.3	900	4	2	1.6	45.3	28
83	25.3	900	4	2	2.1	49.4	22
83	25.3	900	4	2	2.2	58.2	30
83	25.3	900	4	2	2.3	40.5	28
83	25.3	900	4	2	2.4	36.3	33
83	25.3	900	4	2	2.5	40.2	28
83	25.3	900	4	2	2.6	46	0
83	25.3	900	4	2	2.7	45.7	25
83	25.3	900	4	2	3.1	41.4	27
83	25.3	900	4	2	3.2	40.3	32
83	25.3	900	4	2	3.3	40.5	30
83	25.3	900	4	2	3.4	49	31
83	25.3	900	4	2	4.1	35.3	30
83	25.3	900	4	2	4.2	52.8	33
83	25.3	900	4	2	4.3	42.9	24
83	25.3	900	4	2	4.4	43.4	30
83	25.3	900	4	2	4.5	41.5	38
83	25.3	900	4	2	4.6	38.1	30
83	25.3	900	4	2	5.1	57.6	31
83	25.3	900	4	2	5.2	45.6	0
83	25.3	900	4	2	5.3	52	32
83	25.3	900	4	2	5.4	50	32
83	25.3	900	4	2	5.5	43	33
84	25.1	800	2	3	1.1	48.1	0
84	25.1	800	2	3	1.2	45.6	29
84	25.1	800	2	3	1.3	41.7	26
84	25.1	800	2	3	1.4	41	28
84	25.1	800	2	3	2.1	37.8	33
84	25.1	800	2	3	2.2	46	38
84	25.1	800	2	3	2.3	47	39
84	25.1	800	2	3	2.4	44.4	41
84	25.1	800	2	3	2.5	54.3	42
84	25.1	800	2	3	3.1	46.5	43
84	25.1	800	2	3	3.2	43.6	45
84	25.1	800	2	3	3.3	42	40
84	25.1	800	2	3	3.4	35.6	46
84	25.1	800	2	3	4.1	38.9	37
84	25.1	800	2	3	4.2	42.4	39
84	25.1	800	2	3	4.3	34	40
84	25.1	800	2	3	4.4	45.6	41
84	25.1	800	2	3	5.1	46.8	40
84	25.1	800	2	3	5.2	36.2	30
84	25.1	800	2	3	5.3	42.9	0
84	25.1	800	2	3	6.1	36.7	34
84	25.1	800	2	3	6.2	40	31
84	25.1	800	2	3	6.3	46	39
85	25.6	770	2	2	1.1	30.4	44
85	25.6	770	2	2	1.2	42.8	86
85	25.6	770	2	2	1.3	46.3	19
85	25.6	770	2	2	1.4	43.3	27
85	25.6	770	2	2	1.5	35.6	24
85	25.6	770	2	2	1.6	44.2	31
85	25.6	770	2	2	1.7	51.8	0
85	25.6	770	2	2	2.1	38	33
85	25.6	770	2	2	2.2	48	0
85	25.6	770	2	2	2.3	41.6	0
85	25.6	770	2	2	3.1	46.6	0
85	25.6	770	2	2	4.1	43.8	0
85	25.6	770	2	2	4.2	48.7	0
85	25.6	770	2	2	4.3	46.9	46
85	25.6	770	2	2	4.4	55.5	46
85	25.6	770	2	2	5.1	44.2	0
85	25.6	770	2	2	5.2	42.8	42
86	25.1	740	2	3	1.1	0	0
86	25.1	740	2	3	2.1	42.1	34
86	25.1	740	2	3	2.2	47.5	30
86	25.1	740	2	3	2.3	53.2	34
86	25.1	740	2	3	2.4	56.6	33
86	25.1	740	2	3	2.5	54.3	0
86	25.1	740	2	3	3.1	64.7	41
86	25.1	740	2	3	3.2	61.7	37
86	25.1	740	2	3	3.3	42.3	0
86	25.1	740	2	3	3.4	36.8	0
86	25.1	740	2	3	3.5	52	31
86	25.1	740	2	3	4.1	49.5	0
86	25.1	740	2	3	4.2	47	0
86	25.1	740	2	3	4.3	52.7	0
86	25.1	740	2	3	5.1	52.5	0
86	25.1	740	2	3	5.2	46.6	0
86	25.1	740	2	3	6.1	47.6	0
87	25.1	840	3	4	1.1	46.6	26
87	25.1	840	3	4	1.2	44.1	32
87	25.1	840	3	4	1.3	47.7	30
87	25.1	840	3	4	2.1	43.9	0
87	25.1	840	3	4	2.2	49.1	0
87	25.1	840	3	4	2.3	38.3	26
87	25.1	840	3	4	3.1	48.6	32
87	25.1	840	3	4	3.2	46.6	30
87	25.1	840	3	4	4.1	45.7	47
87	25.1	840	3	4	5.1	46	54
87	25.1	840	3	4	5.2	61	0
87	25.1	840	3	4	6.1	44.3	38
87	25.1	840	3	4	6.2	58.9	33
88	25.1	730	1	5	1.1	60.7	0
88	25.1	730	1	5	1.2	52.5	0
88	25.1	730	1	5	1.3	37.7	0
88	25.1	730	1	5	1.4	40.7	0
88	25.1	730	1	5	1.5	49	0
88	25.1	730	1	5	2.1	47	0
88	25.1	730	1	5	2.2	40	0
88	25.1	730	1	5	2.3	46	0
88	25.1	730	1	5	2.4	47	0
88	25.1	730	1	5	2.5	46.6	0
88	25.1	730	1	5	2.6	42.9	0
88	25.1	730	1	5	2.7	41.4	0
88	25.1	730	1	5	3.1	50.3	0
88	25.1	730	1	5	3.2	41	0
88	25.1	730	1	5	3.3	37	0
88	25.1	730	1	5	3.4	38	0
88	25.1	730	1	5	3.5	49.7	0
88	25.1	730	1	5	4.1	56.4	0
88	25.1	730	1	5	4.2	62.5	0
88	25.1	730	1	5	4.3	48.3	0
88	25.1	730	1	5	4.4	59.4	0
88	25.1	730	1	5	5.1	49	0
88	25.1	730	1	5	5.2	51.9	0
88	25.1	730	1	5	5.3	42	0
88	25.1	730	1	5	6.1	42	0
88	25.1	730	1	5	6.2	42.1	0
88	25.1	730	1	5	6.3	50.6	0
88	25.1	730	1	5	7.1	52	0
88	25.1	730	1	5	7.2	66.1	0
88	25.1	730	1	5	7.3	56.7	0
88	25.1	730	1	5	8.1	43.9	0
89	25.3	835	2	3	2.1	55.3	31
89	25.3	835	2	3	2.2	53.1	26
89	25.3	835	2	3	2.3	52	26
89	25.3	835	2	3	2.4	51.2	31
89	25.3	835	2	3	3.1	54.2	0
89	25.3	835	2	3	3.2	52.5	41
89	25.3	835	2	3	3.3	49.2	38
89	25.3	835	2	3	3.4	62.3	0
89	25.3	835	2	3	4.1	45.6	32
89	25.3	835	2	3	4.2	43	0
89	25.3	835	2	3	4.3	44.1	34
89	25.3	835	2	3	4.4	39.5	29
89	25.3	835	2	3	4.5	41.5	39
89	25.3	835	2	3	5.1	40.5	0
89	25.3	835	2	3	6.1	37.7	0
89	25.3	835	2	3	6.2	38	0
90	25.0	580	4	1	1.1	44	25
90	25.0	580	4	1	1.2	31.5	8
90	25.0	580	4	1	1.3	36	30
90	25.0	580	4	1	1.4	52	35
90	25.0	580	4	1	1.5	35.1	31
90	25.0	580	4	1	1.6	39.4	38
90	25.0	580	4	1	2.1	28	43
90	25.0	580	4	1	2.2	26	33
90	25.0	580	4	1	2.3	48	36
90	25.0	580	4	1	2.4	36.7	43
90	25.0	580	4	1	3.1	33.4	36
90	25.0	580	4	1	3.2	54	36
90	25.0	580	4	1	3.3	48.9	43
90	25.0	580	4	1	3.4	56	54
90	25.0	580	4	1	3.5	64	39
90	25.0	580	4	1	4.1	36.9	37
90	25.0	580	4	1	4.2	21.5	0
90	25.0	580	4	1	4.3	50	40
90	25.0	580	4	1	4.4	46	42
90	25.0	580	4	1	4.5	50.7	37
91	25.0	650	1	6	1.1	43.6	31
91	25.0	650	1	6	1.2	45	19
91	25.0	650	1	6	1.3	53	23
91	25.0	650	1	6	1.4	42.5	34
91	25.0	650	1	6	1.5	38.5	34
91	25.0	650	1	6	2.1	35	35
91	25.0	650	1	6	2.2	38.9	37
91	25.0	650	1	6	2.3	42	40
91	25.0	650	1	6	3.1	38.7	0
91	25.0	650	1	6	3.2	29.4	38
91	25.0	650	1	6	3.3	43.4	45
91	25.0	650	1	6	4.1	47.9	45
91	25.0	650	1	6	4.2	41.2	39
91	25.0	650	1	6	4.3	37.5	0
91	25.0	650	1	6	4.4	48	0
91	25.0	650	1	6	5.1	37.5	37
91	25.0	650	1	6	5.2	46.8	51
91	25.0	650	1	6	5.3	41.2	57
91	25.0	650	1	6	5.4	44.7	0
91	25.0	650	1	6	5.5	38.2	71
91	25.0	650	1	6	6.1	55	46
91	25.0	650	1	6	6.2	43	0
91	25.0	650	1	6	6.3	34.1	49
91	25.0	650	1	6	6.4	45.6	44
91	25.0	650	1	6	7.1	45.3	0
91	25.0	650	1	6	7.2	41.6	31
91	25.0	650	1	6	7.3	40.6	0
91	25.0	650	1	6	8.1	26.9	0
91	25.0	650	1	6	8.2	32	0
91	25.0	650	1	6	8.3	47	0
91	25.0	650	1	6	8.4	44.9	0
91	25.0	650	1	6	9.1	42.1	43
91	25.0	650	1	6	9.2	41	42
91	25.0	650	1	6	9.3	43.2	0
92	25.5	910	1	4	2.1	60.7	23
92	25.5	910	1	4	2.2	47.5	23
92	25.5	910	1	4	2.3	44.1	26
92	25.5	910	1	4	2.4	48.6	19
92	25.5	910	1	4	2.5	46.6	27
92	25.5	910	1	4	2.6	50.7	27
92	25.5	910	1	4	3.1	43	31
92	25.5	910	1	4	3.2	49	34
92	25.5	910	1	4	3.3	62.1	36
92	25.5	910	1	4	3.4	44.6	35
92	25.5	910	1	4	4.1	48.4	37
92	25.5	910	1	4	4.2	66.8	35
92	25.5	910	1	4	4.3	48.4	0
92	25.5	910	1	4	4.4	50.3	37
92	25.5	910	1	4	4.5	33	43
92	25.5	910	1	4	4.6	62	38
92	25.5	910	1	4	4.7	117	0
92	25.5	910	1	4	5.1	56.5	37
92	25.5	910	1	4	5.2	50.7	39
92	25.5	910	1	4	5.3	36.5	36
92	25.5	910	1	4	5.4	71.5	35
92	25.5	910	1	4	6.1	53.63	39
92	25.5	910	1	4	6.2	49	32
92	25.5	910	1	4	6.3	58.1	33
92	25.5	910	1	4	6.4	47	33
92	25.5	910	1	4	6.5	52	32
92	25.5	910	1	4	7.1	64	40
92	25.5	910	1	4	7.2	55	0
92	25.5	910	1	4	7.3	64	0
93	25.3	700	4	3	1.1	68	24
93	25.3	700	4	3	1.2	46	21
93	25.3	700	4	3	1.3	64	0
93	25.3	700	4	3	1.4	52	29
93	25.3	700	4	3	2.1	32	34
93	25.3	700	4	3	2.2	27	34
93	25.3	700	4	3	2.3	39	34
93	25.3	700	4	3	2.4	44.1	33
93	25.3	700	4	3	2.5	39.6	31
93	25.3	700	4	3	2.6	38.6	30
93	25.3	700	4	3	3.1	39	0
93	25.3	700	4	3	3.2	44.5	48
93	25.3	700	4	3	3.3	38.5	27
93	25.3	700	4	3	4.1	31.3	28
93	25.3	700	4	3	4.2	27.3	28
93	25.3	700	4	3	4.3	45.8	56
93	25.3	700	4	3	4.4	44.8	38
94	26.4	725	1	3	1.1	0	0
94	26.4	725	1	3	1.2	0	0
94	26.4	725	1	3	2.1	28.1	19
94	26.4	725	1	3	2.2	33.4	38
94	26.4	725	1	3	2.3	35.1	28
94	26.4	725	1	3	2.4	30.9	25
94	26.4	725	1	3	2.5	32.7	33
94	26.4	725	1	3	2.6	29.2	40
94	26.4	725	1	3	2.7	39	0
94	26.4	725	1	3	3.1	41.6	46
94	26.4	725	1	3	3.2	45.9	42
94	26.4	725	1	3	3.3	0	0
[truncated: 4,167 more rows]
